1 **Instantiation of incentive value and movement invigoration by distinct midbrain**  
2 **dopamine circuits**

3

4 **Authors:** Benjamin T. Saunders<sup>1</sup>, Jocelyn M. Richard<sup>1</sup>, Elyssa B. Margolis<sup>2</sup>, and Patricia H.  
5 Janak<sup>1,3</sup>

6 <sup>1</sup>*Department of Psychological and Brain Sciences, Johns Hopkins University, Baltimore, MD*  
7 *21218, USA*

8 <sup>2</sup>*Department of Neurology, Wheeler Center for the Neurobiology of Addiction, Alcoholism and*  
9 *Addiction Research Group, University of California San Francisco, CA 94158, USA*

10 <sup>3</sup>*Department of Neuroscience, Johns Hopkins School of Medicine, Johns Hopkins University,*  
11 *Baltimore, MD 21218, USA*

12

13 **Correspondence:** Benjamin.Saunders@jhu.edu (B.T.S.), Patricia.Janak@jhu.edu (P.H.J.)

14 **Environmental cues, through Pavlovian learning, become conditioned stimuli that guide**  
15 **animals towards the acquisition of “rewards” (i.e., food) that are necessary for survival.**  
16 **Here, we test the fundamental role of midbrain dopamine neurons in conferring**  
17 **predictive or motivational properties to cues, independent of external rewards. We**  
18 **demonstrate that phasic optogenetic excitation of dopamine neurons throughout the**  
19 **midbrain, when presented in temporal association with discrete sensory cues, is**  
20 **sufficient to instantiate those cues as conditioned stimuli that subsequently both evoke**  
21 **dopamine neuron activity on their own, and elicit cue-locked conditioned behaviors.**  
22 **Critically, we identify highly parcellated behavioral functions for dopamine neuron**  
23 **subpopulations projecting to discrete regions of striatum, revealing dissociable**  
24 **mesostriatal systems for the generation of incentive value and movement invigoration.**  
25 **These results show that dopamine neurons orchestrate Pavlovian conditioning via**  
26 **functionally heterogeneous, circuit-specific motivational signals to shape cue-controlled**  
27 **behavior.**

28  
29 The specific contributions of dopamine neurons to learning, motivation and reinforcement  
30 processes, as well as movement, are a longstanding subject of inquiry and debate. This is due  
31 in part to the role dysfunction in dopamine signaling plays in both the motivational and motor  
32 aberrations that define addiction and Parkinson’s disease <sup>1,2</sup>, but a major focus of this work is on  
33 dopamine’s role in normal Pavlovian cue-reward learning. While manipulation of dopamine  
34 neurons can modify the learned value of reward-associated cues (conditioned stimuli, CSs) to  
35 alter reward-seeking behavior <sup>3,4</sup>, and bias a contextual preference <sup>5</sup>, it remains unknown if  
36 phasic dopamine neuron activity, in the absence of physical reward, can directly assign  
37 conditioned properties to discrete sensory cues to create CSs that elicit conditioned behaviors  
38 and, critically, how subpopulations of dopamine neurons <sup>6,7</sup> may differentially contribute to this  
39 process. Here we addressed this fundamental question using a Pavlovian cue conditioning  
40 procedure in which brief optogenetic activation of different groups of dopamine neurons was  
41 substituted for natural reward delivery. We find that dopamine neurons throughout the midbrain  
42 instantiate conditioned stimulus properties in sensory cues, but the motivational value assigned  
43 to cues, and corresponding behavioral consequences, depends on the specific dopamine circuit  
44 engaged.

45

## 46 **RESULTS**

47 **Dopamine neurons uniformly instantiate conditioned stimulus properties in cues**

48 For selective manipulation of dopamine neurons, we expressed ChR2 in the ventral midbrain in  
49 tyrosine hydroxylase (TH)-cre rats<sup>8</sup>, which allowed for optogenetic targeting of TH+/dopamine  
50 neurons with ~97% specificity (Fig. 1a; Supplementary Fig. 1). To compare the contribution of  
51 different dopamine neuronal subpopulations, optical fibers were implanted over ChR2-  
52 expressing dopamine neurons in either the ventral tegmental area (VTA) or substantia nigra  
53 pars compacta (SNc) (Fig. 1c, f; Supplementary Fig. 2). To test the contribution of phasic  
54 dopamine neuron activity in the creation of conditioned stimuli, rats underwent optogenetic  
55 Pavlovian cue conditioning (Fig 1b). Rats in the paired groups received 25 overlapping cue  
56 (light+tone, 7-sec) and laser (473-nm; 5-sec at 20 Hz, delivered 2-sec after cue onset)  
57 presentations per session. The cue light was positioned on one wall of the chamber, within  
58 rearing height for an adult rat. To control for non-associative effects of repeated cues and  
59 optogenetic stimulation, separate rats were exposed to cue and laser presentations that never  
60 overlapped (unpaired groups). VTA and SNc cre+ paired groups both quickly learned  
61 conditioned responses (CRs), defined here simply as locomotion, during the 7-sec cue  
62 presentations, and these CRs emerged progressively earlier in the cue period across training for  
63 both groups (Fig. 1k; Supplementary Fig. 3). Cre+ unpaired and cre- controls did not learn CRs  
64 (Fig. 1d, g; Supplementary Fig. 3). The latency of CR onset in paired groups decreased across  
65 training, and, late in training, most CRs were initiated during the first 2-sec of each cue period,  
66 before laser onset, for both VTA and SNc cre+ paired groups (Fig. 1i-k). This indicates that  
67 behavior in paired subjects was elicited by cue presentations, rather than directly by laser  
68 stimulation. Further supporting this, optogenetic activation of dopamine neurons in cre+  
69 unpaired groups failed to generate behavior statistically different from cre- controls; unpaired  
70 cre+ rats did not develop conditioned responses during either the cue or laser periods (Fig. 1e,  
71 h). These results show that unsignalled phasic midbrain dopamine neuron activity in the VTA or  
72 SNc does not act as an unconditioned or conditioned stimulus that can elicit overt conditioned  
73 behaviors. Thus, dopamine neuron activity can fully serve as an unconditioned stimulus that can  
74 create Pavlovian CSs, given the appropriate temporal contingency, but does not itself act as a  
75 CS. Our results further suggest that, more broadly, the presence or absence of salient sensory  
76 cues at the time dopamine neurons are active serves as a critical gate on the ability of  
77 dopamine neurons to promote behavior. This provides important context to recent studies on  
78 the contribution of dopamine neurons to explicit unconditioned movements<sup>9-11</sup>, and may  
79 suggest a role for impaired Pavlovian conditioning in movement disorders.

80

81 **Dopamine neurons develop phasic activity to dopamine-predictive cues**

82 Cues paired with natural reward evoke phasic activity in dopamine neurons, and dopamine  
83 release in striatal projection targets<sup>12-14</sup>. Given that we found optogenetic stimulation of  
84 dopamine neurons induced conditioned behavior to discrete paired cues, we asked if dopamine  
85 neurons might acquire phasic neural responses to these paired cues, using fiber photometry<sup>15</sup>.  
86 For simultaneous optogenetic stimulation and activity measurement in the same neurons, we  
87 co-transfected dopamine neurons with ChrimsonR, a red-shifted excitatory opsin, and the  
88 fluorescent calcium indicator GCaMP6f (Fig. 2a and b). This strategy led to a 98% overlap of  
89 GCaMP6 and ChrimsonR expression in TH+ neurons below optic fiber placements in the  
90 midbrain (Supplementary Fig. 4a-c). Photoactivation of ChrimsonR (590-nm laser) led to rapid,  
91 stable increases in GCaMP6f fluorescence (Supplementary Fig. 4d and e). To test the  
92 behavioral specificity of light activation of ChrimsonR, we confirmed that 590-nm activation of  
93 ChrimsonR-expressing dopamine neurons supported robust intracranial self-stimulation  
94 behavior (Supplementary Fig. 4f and g), which rapidly extinguished when the 590-nm laser was  
95 switched to a 473-nm laser (Supplementary Fig. 4g; session 3).

96  
97 To assess cue-evoked neural dynamics, we monitored dopamine neuron fluorescence during  
98 optogenetic Pavlovian conditioning (Fig. 2c). As with the ChR2 experiments (Fig. 1), cues paired  
99 with ChrimsonR-mediated optogenetic activation of dopamine neurons came to reliably evoke  
100 conditioned behavior (Fig. 2d). In these cue-laser paired rats, we observed an increase in  
101 fluorescence at cue onset that grew in magnitude across training (Fig. 2e, f, i, and j; Day 1 vs  
102 12; Supplementary Fig. 4h-k), while laser-evoked fluorescence was stable across training (Fig.  
103 2e). As a comparison to natural conditioning, we also saw robust fluorescence in response to  
104 sucrose consumption and sucrose-predictive cues (Supplementary Fig. 5), suggesting that  
105 optogenetic conditioning taps into innate conditioning mechanisms. We further found, in probe  
106 trials in which cues were delivered with no laser, dopamine neuron activity decreased at the  
107 exact time laser would have been delivered (Fig. 2g and h Day 1 vs 12). Electrophysiological  
108 recordings of dopamine neurons demonstrate a decrease in their firing during the omission of  
109 expected food or water<sup>16</sup>, which is thought to be mediated by recruitment of local GABAergic  
110 neuron activity<sup>17</sup>. Finally, our trial-by-trial analysis revealed that, across training, on trials where  
111 a CR occurred, cue-evoked dopamine neuron activity became loosely predictive of the latency  
112 of behavior onset; larger magnitude cue-evoked fluorescence was associated with faster  
113 conditioned response initiation (Fig. 2k, l). These results show that dopamine neurons develop  
114 phasic activity to CSs paired with their activation, in the absence of the constellation of sensory  
115 inputs that typically accompany seeking and consumption of natural rewards. Further, the

116 magnitude of cue-evoked dopamine neuronal activity partially encodes the vigor of conditioned  
117 behavior.

118

119 **VTA and SNc dopamine neurons confer distinct conditioned motivational properties to**  
120 **cues**

121 Reward-associated CSs direct actions not just by serving as reward predictors that evoke neural  
122 activity, but also by acquiring reward-like incentive properties, thus becoming incentive stimuli  
123 (ISs) that lend them motivational power to attract attention and maintain behavior in the absence  
124 of reward itself, which can contribute to compulsive seeking in addiction<sup>18,19</sup>. While learning  
125 about VTA and SNc dopamine paired cues commenced at a similar rate and magnitude,  
126 suggesting uniform dopamine neuron function in creating CSs, we next asked if VTA and SNc  
127 dopamine-associated CSs differentially served as incentive stimuli. To do this, we examined the  
128 detailed structure of behavior during Pavlovian conditioning in ChR2-conditioned groups. In  
129 response to cue presentations, cre+ paired VTA rats (Fig. 3a) showed cue-directed approach  
130 behavior, moving to come into proximity (< 1 in) with the cue light (Fig 3b, c; Supplementary Fig.  
131 6; Video 1). This “attraction” conditioned response reflects the assignment of incentive  
132 motivational value to a CS<sup>20-22</sup>. Critically, approach probability did not relate to subjects’  
133 proximity to the cue at cue onset (Supplementary Fig. 7), and was not observed in unpaired or  
134 cre- VTA controls (Fig 3b, c; Supplementary Videos 2-4). These results indicate that VTA  
135 dopamine neuron activity can create an incentive stimulus, and that conferral of incentive value  
136 does not require typical reward-elicited neuronal processes other than dopamine neuron  
137 activation.

138

139 In contrast to VTA rats, cre+ paired SNc rats (Fig. 3d) did not show cue approach (Fig. 3e, f;  
140 Supplementary Fig. 6), but instead expressed conditioned behavior as vigorous movement not  
141 directed at the cue. This took the form of turning behavior, where animals ran in circles within  
142 the chamber. Circling emerged early in training for SNc rats (Fig. 4a, b; Supplementary Video  
143 5). Importantly, circling was cue-evoked and did not occur in cre+ unpaired or cre- groups (Fig.  
144 4b). For VTA cre+ paired rats, cue approach was the dominant CR early in training, but on  
145 average they also began to develop circling, resulting in a mixed behavioral phenotype for some  
146 rats late in training (Fig. 4b & e). Compared to SNc rats, which never approached the cue, and  
147 showed an immediate circling bias, VTA rats developed circling more slowly (Fig. 4b-e). The  
148 transition of VTA rats from cue-directed locomotion to a mixture of cue-directed and non-cue-  
149 directed locomotion may reflect the progressive recruitment of ascending serial circuits across

150 extended training<sup>23,24</sup>, resulting in cue-related dorsal striatal dopamine release and behavioral  
151 control<sup>25,26</sup>. Together these results show that dopamine neurons contribute to Pavlovian  
152 conditioned incentive motivation and movement invigoration in anatomically distinct ways and  
153 on different timescales throughout the progression of learning.

154

155 Incentive stimuli, in addition to being attractive, can also become desirable, in that they reinforce  
156 actions that lead to their obtainment. This process is critical for durable reward-seeking  
157 behaviors when reward is not immediately available<sup>18</sup>. Building on the results shown above  
158 (Fig. 3), we next asked if VTA and SNc dopamine optogenetically-conditioned CSs could  
159 subsequently serve as conditioned or “secondary” reinforcers<sup>18,27</sup>, to support a new action in  
160 the absence of optogenetic stimulation (Fig. 5a). Cre+ paired VTA (Fig. 5c), but not SNc (Fig.  
161 5d) rats responded robustly to receive conditioned cue presentations, relative to unpaired and  
162 cre- controls, indicating that the instantiation of conditioned reinforcement is specific to VTA  
163 dopamine neurons. The ability of a cue to serve as a conditioned reinforcer reflects the  
164 assignment of incentive motivational value and suggests, for VTA rats only, in addition to simply  
165 eliciting conditioned behaviors, the CS became a stimulus for which they were motivated to  
166 respond in its own right<sup>28</sup>. Furthermore, this shows that, while SNc-paired cues can generate  
167 vigorous movement (Fig. 4) the functional content of the signal conditioned through SNc  
168 dopamine neurons is fundamentally distinct from VTA dopamine neurons, because it does not  
169 confer incentive value.

170

171 We next assessed the primary reinforcing value of dopamine neuron activation, in an  
172 intracranial self-stimulation paradigm<sup>8,29</sup>, where active nose pokes resulted in a brief laser train  
173 delivery, with no associated cues (Fig. 5b). Unlike the anatomical dissociation in conditioned  
174 reinforcement, VTA and SNc dopamine neuron stimulation created similar levels of primary  
175 reinforcement (Fig. 5e). Taken together, our results show that brief, phasic activity of VTA  
176 dopamine neurons is sufficient to apply incentive value to previously neutral environmental cues  
177 to promote attraction and create conditioned reinforcement. SNc dopamine neuron activity,  
178 alternatively, imbues cues with conditioned stimulus properties that promote movement  
179 invigoration more generally. Direct reinforcement of an instrumental action, in contrast to these  
180 divergent Pavlovian cue conditioning functions, is uniformly supported across dopamine  
181 subpopulations<sup>8,30</sup>.

182

183 **Mesostriatal-circuit specific instantiation of incentive value**

184 Dopamine signaling within striatal compartments can modulate the incentive value of reward-  
185 associated cues<sup>31–34</sup>, but it is unknown if distinct dopamine projections to striatum can create  
186 incentive stimuli. Given this mesostriatal complexity, and that the VTA effects described above  
187 could be driven by dopamine projections to non-striatal targets<sup>35</sup>, we next determined if an  
188 incentive value signal could be created by phasic activity in dopamine neurons projecting into  
189 distinct sub-regions of the striatum. We transfected the striatum of TH-cre+ rats with a  
190 retrogradely-transported AAV vector containing ChR2 (Fig. 6a and b), which produced robust  
191 expression in dopamine neurons in the midbrain. *Ex vivo* electrophysiological recordings  
192 showed that ChR2-expressing dopamine neurons projecting to the ventral striatum/nucleus  
193 accumbens (NAc) and dorsal striatum (DS) reliably followed 100 pulses of 20-Hz blue light  
194 stimulation with action potentials (Fig. 6c-e; Supplementary Fig. 9). In independent groups of  
195 rats, we targeted striatal injections to dopamine terminals in the NAc core, medial shell, or DS,  
196 which resulted in projection-defined expression patterns among TH+ neurons in the midbrain  
197 (Supplementary Fig. 8). Cell bodies of dopamine projections to the shell were concentrated in  
198 the ventromedial VTA (Fig 6f; Supplementary Fig. 8), projections to the core were concentrated  
199 in the dorsolateral VTA (Fig. 6g; Supplementary Fig. 8), and DS projections occupied the  
200 medial-lateral extent of the SNc (Fig. 6h; Supplementary Fig. 8). We targeted optic fibers over  
201 the midbrain in these animals for projection-specific optogenetic activation (Fig. 6i-k). After  
202 repeated Pavlovian conditioning of a cue with photoactivation of VTA-Core<sup>TH</sup>, VTA-Shell<sup>TH</sup>, or  
203 SNc-DS<sup>TH</sup> neurons, only NAc core-projecting dopamine associated cues became conditioned  
204 reinforcers (Fig. 6l). Primary reinforcement, in contrast, was similar for all projection groups (Fig.  
205 6m). Thus, dopamine neurons confer heterogeneous and tightly parcellated conditioned  
206 motivational signals about cues in a projection-defined manner.

207

## 208 Discussion

209 Here we trained rats to associate sensory cues with optogenetic activation of dopamine  
210 neurons. We found that, by virtue of a temporal association, the cues acquired conditioned  
211 stimulus properties that allowed them to evoke conditioned behaviors and conditioned  
212 dopamine neuron activity. Critically, the topography of behavior evoked by conditioned cues  
213 varied according to which dopamine neuron subpopulation was targeted. These results  
214 demonstrate a fundamental dissociation in the function of dopamine neurons in Pavlovian  
215 conditioned motivation, where VTA-associated cues acquire incentive value, and SNC-  
216 associated cues invigorate intense locomotion. We further found that the incentive value signal  
217 was specific to nucleus accumbens core projecting dopamine neurons. Together, these results

218 suggest highly parcellated motivational functional specialization for distinct mesostriatal  
219 dopamine circuits in Pavlovian reward.

220

### 221 **Dopamine neurons have similar learning but heterogeneous motivational functions**

222 Our results confirm a longstanding fundamental assumption in reward neuroscience – that  
223 activity in dopamine neurons can create a Pavlovian conditioned stimulus that elicits conditioned  
224 behavioral responses. That is, dopamine neurons do not merely update Pavlovian associations  
225 between cues and external rewards<sup>3</sup>, they generate associations de novo, doing so in the  
226 absence of normal sensory inputs and corresponding brain processes that typically accompany  
227 systemic reward exposure and consumption. Importantly, our results extend previous studies  
228 assessing dopamine neuron function using optogenetic place conditioning paradigms<sup>5</sup>, which  
229 mix Pavlovian learning and instrumental reinforcement processes over extended periods, by  
230 showing that discrete, transient cues become conditioned stimuli via association with relatively  
231 brief bursts of dopamine neuron activity. Further, we demonstrate that conditioned stimulus  
232 instantiation is a function uniformly present across the major dopamine neuron output systems  
233 in the ventral midbrain, the VTA and SNc (Fig. 1). We found that these conditioned stimuli  
234 evoked activity in dopamine neurons themselves (Fig. 2), similar to what has been previously  
235 demonstrated during natural (i.e., food) cue conditioning using electrophysiological approaches  
236<sup>12,14,36</sup>. Our results extend these studies by providing insight into the functional content of  
237 Pavlovian cue-evoked bursts in dopamine neuron activity. We found that the magnitude of cue-  
238 evoked fluorescence was inversely related to the latency of conditioned behaviors. This  
239 relationship, while moderate, suggests that cue-evoked dopamine neuron signals at least  
240 partially encode the motivational value of conditioned cues, which manifests as the vigor or  
241 intensity of conditioned behavior<sup>4,37</sup>.

242

243 Our next primary finding is that dopamine neurons in the VTA and SNc exhibited divergent  
244 conditioned motivational functions (Figs. 3-5). VTA, but not SNc dopamine neurons conferred a  
245 signal that instantiated cues as incentive stimuli, making those cues attractive and reinforcing on  
246 their own. These results extend a large body of research implicating dopamine signaling in cue  
247 attraction and conditioned reinforcement<sup>18,20,21,32,33,38,39</sup>, by showing that dopamine neurons  
248 create these properties during Pavlovian conditioning, in the absence of reward receipt or  
249 consumption. Thus, a primary function of VTA dopamine neurons activity is to apply incentive  
250 value to current sensory information in an animal's environment.

251



252 We found that SNc dopamine neurons, alternatively, conferred a more general movement  
253 invigoration signal; cues paired with their activation evoked locomotion not directed at the cue,  
254 and they failed to serve as conditioned reinforcers. These results demonstrate that distinct  
255 components of conditioned reward are represented and controlled by different dopamine output  
256 systems. While nigrostriatal dopamine neurons do not appear to instantiate incentive value to  
257 Pavlovian conditioned stimuli, they clearly do confer some important motivational properties,  
258 however, because SNc-paired cues evoked vigorous movement. In general, nigrostriatal  
259 dopamine has been more clearly linked to behavior in instrumental, rather than Pavlovian  
260 conditioning<sup>40</sup>. While dorsal striatal dopamine signaling is not required for the expression of  
261 approach to Pavlovian conditioned cues<sup>41</sup>, the dorsal striatum is necessary for the ability of  
262 Pavlovian conditioned cues to invigorate ongoing instrumental actions<sup>42</sup>. Thus, SNc dopamine  
263 neurons may not make cues themselves attractive and reinforcing during Pavlovian  
264 conditioning, but in a setting where Pavlovian and instrumental contingencies are intermingled,  
265 the ability of SNc dopamine paired cues to produce locomotion may be expressed as  
266 invigoration of specific instrumental actions. Future work will be needed to further explore the  
267 motivational content conferred by SNc dopamine neurons, as well as how dorsomedial and  
268 dorsolateral projecting dopamine neurons may differ, given recent studies<sup>40,43–45</sup>.

269

### 270 **Striatal dopamine in Parkinson's and addiction**

271 Our results show that at least some types of movements reflect a conditioned state resulting  
272 from an association between dopamine neuron activity and the presentation of external sensory  
273 cues – un-cued dopamine neuron activation did not generate locomotion in our studies. This  
274 provides context for recent work assessing dopamine neuron activity during self-initiated or  
275 spontaneous movements<sup>9,10</sup>, by showing that dopamine-mediated movements that are not self-  
276 generated are gated by the presence of salient sensory inputs. These results may have  
277 relevance to motor diseases, such as Parkinson's, where patients exhibit deficits in movement  
278 patterning and kinesthesia, which is heavily dependent on sensory input<sup>46</sup>. Conditioning with  
279 visual cues can improve some movement deficits in Parkinson's patients<sup>47</sup>. Thus, external  
280 signals are critical for normal expression of movement, and our results suggest that dopamine  
281 neurons contribute to this process by assigning motivational value to cues, allowing them to  
282 draw attention, invigorate, and consequently control locomotion. In Parkinson's disease, where  
283 nigrostriatal dopamine is preferentially depleted, this attribution may be blunted, producing  
284 movement impairment that is at least partially due to deficits in cue-triggered invigoration of  
285 movement.

286

287 Attributing incentive value to reward-related cues is essential for adaptive behaviors, but  
288 pathological attribution of incentive value to cues and rewards underlies impulse control  
289 disorders, like addiction<sup>1</sup>. Our results establish that mesolimbic dopamine neurons instantiate  
290 incentive value to generate attraction and conditioned reinforcement. They suggest, broadly,  
291 that features in an individual's environment that coincide with elevated mesolimbic dopamine  
292 neuron activity will acquire incentive value, a process that will be amplified by drug exposure  
293<sup>18,21,48</sup>. Interestingly, we also found, late in Pavlovian training, cues paired with VTA dopamine  
294 neuron activation began to evoke non-specific (i.e., not cue directed) movement, similar to SNc-  
295 paired cues (Fig. 4). This transition could reflect progressive recruitment of dorsal striatal  
296 projecting dopamine neurons<sup>23,25</sup>. Nigrostriatal dopamine is thought to contribute to  
297 perseverative action patterns, which is important for habitual drug consumption seen in  
298 addiction<sup>49,50</sup>. Thus, a combination of pathological cue-driven incentive value and movement  
299 invigoration, reflecting progressive engagement of ventral and dorsal striatal dopamine circuits,  
300 could produce a persistent, inflexible reward-seeking condition that promotes addiction.

301

### 302 **Dopamine circuit-specific conditioned motivational functions**

303 Our results are among the first to isolate distinct conditioned motivational functions for phasic  
304 activity among specific dopamine projections, providing an important step towards  
305 understanding how dopamine neurons orchestrate Pavlovian reward moment-to-moment at the  
306 circuit level. We found that only dopamine neurons projecting to the nucleus accumbens core  
307 created incentive value for Pavlovian conditioned cues (Fig. 6), suggesting that dopamine  
308 neuron function is highly segregated by striatal projection target. Our results are consistent with  
309 data from a number of studies showing a role for dopamine release in the core in cue-evoked  
310 behaviors in general, and incentive motivation specifically<sup>20,31,51</sup>. It is somewhat surprising that  
311 medial shell-projecting dopamine neurons did not confer incentive value to Pavlovian cues,  
312 given that previous studies generally implicate dopamine signaling in the shell in incentive  
313 motivation<sup>33,34,52,53</sup>. Our results suggest that while medial shell dopamine tone can modulate the  
314 incentive value of reward-associated cues, phasic shell-projecting dopamine neuron activity  
315 does not instantiate it.

316

317 Among dopamine neurons, there is considerable genetic, anatomical, and physiological  
318 diversity<sup>6,7</sup>. While medial accumbens shell dopamine neurons have been compared to those  
319 projecting to the dorsal striatum, prefrontal cortex, and amygdala<sup>54,55</sup>, less is known about how

320 medial shell and core inputs differ. The medial shell may receive relatively more input from VTA  
321 neurons that co-release dopamine and glutamate that are concentrated in the medial VTA <sup>6</sup>,  
322 which could confer unique function, compared to the core. Dopamine actions on medium spiny  
323 neurons in the core and shell are also regulated by differential inputs from the prefrontal cortex  
324 <sup>56</sup>. A functional and anatomical input-output assessment for dopamine neurons <sup>57</sup> projecting to  
325 the shell versus core, and for medium spiny neurons in the shell versus core, is an important  
326 future direction for understanding mesocorticolimbic network-level control of conditioned  
327 motivation.

328

### 329 **Conclusions**

330 In summary, we show that brief, phasic dopamine neuron activity throughout the midbrain can  
331 create a conditioned stimulus in the absence of external reward. Our studies provide important  
332 context to previous research suggesting a uniform contribution of dopamine neurons to  
333 stimulus-reward learning <sup>36</sup>, and unconditioned dopamine axon signaling <sup>9</sup>, however, by showing  
334 that considerable heterogeneity exists in the functional content of information signaled by  
335 different dopamine neurons during conditioning <sup>44</sup>. Circuit-defined dopamine neuron activity  
336 induced learning of cue-guided behavior by directing behavior towards cues themselves,  
337 indicating the attribution of incentive value, or by allowing cues to more nonspecifically  
338 invigorate movement. The combination of both forms of cue-guided behavior may be necessary  
339 for successful reward seeking under changing conditions and environments. Finally, because  
340 the animals in our studies never received a traditional food reward, yet developed the type of  
341 cue-evoked behaviors typically seen during conditioned reward seeking, our studies suggest  
342 that dopamine systems are specialized for supporting and engendering circuit-specific  
343 adaptations that promote the expression of discrete classes of motivated behavior in response  
344 to reward cues. While normally these sensory cues may signal opportunity for reward, actual  
345 commerce with the reward is not required for the acquisition of cue-evoked behaviors, and,  
346 most strikingly, the acquisition of conditioned incentive motivation by cues.

347

348 **Acknowledgements:** We thank members of the Janak laboratory for discussion and comments  
349 on the manuscript; D. Acs, H. Pribut, K. Lineback, N. Pettas, B. Persaud, and L. Kinny for  
350 assistance with histology and behavioral video scoring; P. Fong for conducting surgical  
351 procedures for *ex vivo* physiology studies; K. Deisseroth (Stanford) for the ChR2 construct; E.  
352 Boyden (MIT) for the ChrimsonR construct; and the Janelia Research Campus GENIE Project  
353 and Stanford Gene Vector and Virus Core for the GCaMP6f construct. This work was supported

354 by National Institutes of Health grants DA036996 (BTS), DA042895 (BTS), AA022290 (JMR),  
355 AA025384 (JMR), DA030529 (EBM), and DA035943 (PHJ), as well as grants from the Brain  
356 and Behavior Research Foundation (BTS and JMR).

357

358 **Author Contributions:** BTS and PHJ designed the experiments. BTS collected and analyzed  
359 data from ChR2 experiments. JMR built the photometry system, BTS and JMR collected  
360 photometry data, and JMR analyzed the photometry data. EBM collected and analyzed the *ex*  
361 *vivo* physiology data. BTS and PHJ wrote the manuscript with input from all the authors.

362

363 **Author Information:** The authors declare no competing financial interests. Correspondence  
364 and requests for materials should be addressed to BTS ([benjamin.saunders@jhu.edu](mailto:benjamin.saunders@jhu.edu)) or PHJ  
365 ([patricia.janak@jhu.edu](mailto:patricia.janak@jhu.edu)).

366

## 367 **References**

368

- 369 1. Robinson, T. E. & Berridge, K. C. The neural basis of drug craving: an incentive-  
370 sensitization theory of addiction. *Brain Res Brain Res Rev* **18**, 247–291 (1993).
- 371 2. Dauer, W. & Przedborski, S. Parkinson’s Disease. *Neuron* **39**, 889–909 (2003).
- 372 3. Steinberg, E. E. *et al.* A causal link between prediction errors, dopamine neurons and  
373 learning. *Nat Neurosci* **16**, 966–973 (2013).
- 374 4. Hamid, A. A. *et al.* Mesolimbic dopamine signals the value of work. *Nat Neurosci* **19**,  
375 117–126 (2016).
- 376 5. Tsai, H.-C. *et al.* Phasic firing in dopaminergic neurons is sufficient for behavioral  
377 conditioning. *Science* **324**, 1080–1084 (2009).
- 378 6. Morales, M. & Margolis, E. B. Ventral tegmental area: cellular heterogeneity, connectivity  
379 and behaviour. *Nat Rev Neurosci* **18**, 73–85 (2017).
- 380 7. Lammel, S., Lim, B. K. & Malenka, R. C. Reward and aversion in a heterogeneous  
381 midbrain dopamine system. *Neuropharmacology* **76 Pt B**, 351–359 (2014).
- 382 8. Witten, I. B. *et al.* Recombinase-driver rat lines: tools, techniques, and optogenetic  
383 application to dopamine-mediated reinforcement. *Neuron* **72**, 721–733 (2011).
- 384 9. Howe, M. W. & Dombeck, D. A. Rapid signalling in distinct dopaminergic axons during  
385 locomotion and reward. *Nature* **535**, 505–510 (2016).
- 386 10. Dodson, P. D. *et al.* Representation of spontaneous movement by dopaminergic  
387 neurons is cell-type selective and disrupted in parkinsonism. *Proc Natl Acad Sci U S A* **113**,  
388 E2180–8 (2016).

- 398  
399 11. Panigrahi, B. *et al.* Dopamine is required for the neural representation and control of  
400 movement vigor. *Cell* **162**, 1418–1430 (2015).  
401  
402 12. Cohen, J. Y., Haesler, S., Vong, L., Lowell, B. B. & Uchida, N. Neuron-type-specific  
403 signals for reward and punishment in the ventral tegmental area. *Nature* **482**, 85–88 (2012).  
404  
405 13. Day, J. J., Roitman, M. F., Wightman, R. M. & Carelli, R. M. Associative learning  
406 mediates dynamic shifts in dopamine signaling in the nucleus accumbens. *Nat Neurosci* **10**,  
407 1020–1028 (2007).  
408  
409 14. Schultz, W., Dayan, P. & Montague, P. R. A neural substrate of prediction and reward.  
410 *Science* **275**, 1593–1599 (1997).  
411  
412 15. Gunaydin, L. A. *et al.* Natural neural projection dynamics underlying social behavior. *Cell*  
413 **157**, 1535–1551 (2014).  
414  
415 16. Waelti, P., Dickinson, A. & Schultz, W. Dopamine responses comply with basic  
416 assumptions of formal learning theory. *Nature* **412**, 43–48 (2001).  
417  
418 17. Eshel, N. *et al.* Arithmetic and local circuitry underlying dopamine prediction errors.  
419 *Nature* **525**, 243–246 (2015).  
420  
421 18. Cardinal, R. N., Parkinson, J. A., Hall, J. & Everitt, B. J. Emotion and motivation: the role  
422 of the amygdala, ventral striatum, and prefrontal cortex. *Neurosci Biobehav Rev* **26**, 321–352  
423 (2002).  
424  
425 19. Wise, R. A. Dopamine, learning and motivation. *Nat Rev Neurosci* **5**, 483–494 (2004).  
426  
427 20. Flagel, S. B. *et al.* A selective role for dopamine in stimulus-reward learning. *Nature* **469**,  
428 53–57 (2011).  
429  
430 21. Berridge, K. C. The debate over dopamine's role in reward: the case for incentive  
431 salience. *Psychopharmacology (Berl)* **191**, 391–431 (2007).  
432  
433 22. Milton, A. L. & Everitt, B. J. The psychological and neurochemical mechanisms of drug  
434 memory reconsolidation: implications for the treatment of addiction. *Eur J Neurosci* **31**, 2308–  
435 2319 (2010).  
436  
437 23. Haber, S. N., Fudge, J. L. & McFarland, N. R. Striatonigrostriatal pathways in primates  
438 form an ascending spiral from the shell to the dorsolateral striatum. *J Neurosci* **20**, 2369–2382  
439 (2000).  
440  
441 24. Ikemoto, S. Dopamine reward circuitry: two projection systems from the ventral midbrain  
442 to the nucleus accumbens-olfactory tubercle complex. *Brain Res Rev* **56**, 27–78 (2007).  
443  
444 25. Belin, D. & Everitt, B. J. Cocaine seeking habits depend upon dopamine-dependent  
445 serial connectivity linking the ventral with the dorsal striatum. *Neuron* **57**, 432–441 (2008).  
446  
447 26. Willuhn, I., Burgeno, L. M., Everitt, B. J. & Phillips, P. E. M. Hierarchical recruitment of  
448 phasic dopamine signaling in the striatum during the progression of cocaine use. *Proc Natl Acad*

- 449 *Sci U S A* **109**, 20703–20708 (2012).  
450
- 451 27. Stein, L. Secondary Reinforcement Established with Subcortical Stimulation. *Science*  
452 **127**, 466–467 (1958).  
453
- 454 28. Berridge, K. C. & Robinson, T. E. What is the role of dopamine in reward: hedonic  
455 impact, reward learning, or incentive salience? *Brain Res Brain Res Rev* **28**, 309–369 (1998).  
456
- 457 29. Corbett, D. & Wise, R. A. Intracranial self-stimulation in relation to the ascending  
458 dopaminergic systems of the midbrain: a moveable electrode mapping study. *Brain Res* **185**, 1–  
459 15 (1980).  
460
- 461 30. Ilango, A. *et al.* Similar roles of substantia nigra and ventral tegmental dopamine  
462 neurons in reward and aversion. *J Neurosci* **34**, 817–822 (2014).  
463
- 464 31. Saunders, B. T. & Robinson, T. E. The role of dopamine in the accumbens core in the  
465 expression of Pavlovian-conditioned responses. *Eur J Neurosci* **36**, 2521–2532 (2012).  
466
- 467 32. Taylor, J. R. & Robbins, T. W. Enhanced behavioural control by conditioned reinforcers  
468 following microinjections of d-amphetamine into the nucleus accumbens. *Psychopharmacology*  
469 (*Berl*) **84**, 405–412 (1984).  
470
- 471 33. Kelley, A. E. & Delfs, J. M. Dopamine and conditioned reinforcement.  
472 *Psychopharmacology (Berl)* (1991). at  
473 <<http://www.springerlink.com/index/P2717106727485K5.pdf>>  
474
- 475 34. Parkinson, J. A., Olmstead, M. C., Burns, L. H., Robbins, T. W. & Everitt, B. J.  
476 Dissociation in effects of lesions of the nucleus accumbens core and shell on appetitive  
477 pavlovian approach behavior and the potentiation of conditioned reinforcement and locomotor  
478 activity by D-amphetamine. *J Neurosci* **19**, 2401–2411 (1999).  
479
- 480 35. Swanson, L. W. The projections of the ventral tegmental area and adjacent regions: a  
481 combined fluorescent retrograde tracer and immunofluorescence study in the rat. *Brain Res Bull*  
482 **9**, 321–353 (1982).  
483
- 484 36. Eshel, N., Tian, J., Bukwich, M. & Uchida, N. Dopamine neurons share common  
485 response function for reward prediction error. *Nat Neurosci* **19**, 479–486 (2016).  
486
- 487 37. Wassum, K. M., Ostlund, S. B., Loewinger, G. C. & Maidment, N. T. Phasic mesolimbic  
488 dopamine release tracks reward seeking during expression of Pavlovian-to-instrumental  
489 transfer. *Biol Psychiatry* **73**, 747–755 (2013).  
490
- 491 38. Pascoli, V., Terrier, J., Hiver, A. & Lüscher, C. Sufficiency of mesolimbic dopamine  
492 neuron stimulation for the progression to addiction. *Neuron* **88**, 1054–1066 (2015).  
493
- 494 39. Burgess, C. P. *et al.* High-Yield Methods for Accurate Two-Alternative Visual  
495 Psychophysics in Head-Fixed Mice. *Cell Rep* **20**, 2513–2524 (2017).  
496
- 497 40. Balleine, B. W., Delgado, M. R. & Hikosaka, O. The role of the dorsal striatum in reward  
498 and decision-making. *J Neurosci* **27**, 8161–8165 (2007).  
499

- 500 41. Fraser, K. M. & Janak, P. H. Long-lasting contribution of dopamine in the nucleus  
501 accumbens core, but not dorsal lateral striatum, to sign-tracking. *Eur J Neurosci* **46**, 2047–2055  
502 (2017).  
503
- 504 42. Corbit, L. H. & Janak, P. H. Inactivation of the lateral but not medial dorsal striatum  
505 eliminates the excitatory impact of Pavlovian stimuli on instrumental responding. *J Neurosci* **27**,  
506 13977–13981 (2007).  
507
- 508 43. Lerner, T. N. *et al.* Intact-Brain Analyses Reveal Distinct Information Carried by SNc  
509 Dopamine Subcircuits. *Cell* **162**, 635–647 (2015).  
510
- 511 44. Parker, N. F. *et al.* Reward and choice encoding in terminals of midbrain dopamine  
512 neurons depends on striatal target. *Nat Neurosci* **19**, 845–854 (2016).  
513
- 514 45. Matsumoto, M. & Hikosaka, O. Two types of dopamine neuron distinctly convey positive  
515 and negative motivational signals. *Nature* **459**, 837–841 (2009).  
516
- 517 46. Klockgether, T., Borutta, M., Rapp, H., Spieker, S. & Dichgans, J. A defect of kinesthesia  
518 in Parkinson’s disease. *Mov Disord* **10**, 460–465 (1995).  
519
- 520 47. Azulay, J. P. *et al.* Visual control of locomotion in Parkinson’s disease. *Brain* **122 ( Pt 1)**,  
521 111–120 (1999).  
522
- 523 48. Uslaner, J. M., Acerbo, M. J., Jones, S. A. & Robinson, T. E. The attribution of incentive  
524 salience to a stimulus that signals an intravenous injection of cocaine. *Behav Brain Res* **169**,  
525 320–324 (2006).  
526
- 527 49. Everitt, B. J. & Robbins, T. W. Neural systems of reinforcement for drug addiction: from  
528 actions to habits to compulsion. *Nat Neurosci* **8**, 1481–1489 (2005).  
529
- 530 50. Keiflin, R. & Janak, P. H. Dopamine prediction errors in reward learning and addiction:  
531 from theory to neural circuitry. *Neuron* **88**, 247–263 (2015).  
532
- 533 51. Di Ciano, P., Cardinal, R. N., Cowell, R. A., Little, S. J. & Everitt, B. J. Differential  
534 involvement of NMDA, AMPA/kainate, and dopamine receptors in the nucleus accumbens core  
535 in the acquisition and performance of pavlovian approach behavior. *J Neurosci* **21**, 9471–9477  
536 (2001).  
537
- 538 52. Saddoris, M. P., Cacciapaglia, F., Wightman, R. M. & Carelli, R. M. Differential  
539 dopamine release dynamics in the nucleus accumbens core and shell reveal complementary  
540 signals for error prediction and incentive motivation. *J Neurosci* **35**, 11572–11582 (2015).  
541
- 542 53. Wyvell, C. L. & Berridge, K. C. Intra-accumbens amphetamine increases the conditioned  
543 incentive salience of sucrose reward: enhancement of reward “wanting” without enhanced  
544 “liking” or response reinforcement. *J Neurosci* **20**, 8122–8130 (2000).  
545
- 546 54. Margolis, E. B., Mitchell, J. M., Ishikawa, J., Hjelmstad, G. O. & Fields, H. L. Midbrain  
547 dopamine neurons: projection target determines action potential duration and dopamine D(2)  
548 receptor inhibition. *J Neurosci* **28**, 8908–8913 (2008).  
549
- 550 55. Lammel, S., Ion, D. I., Roeper, J. & Malenka, R. C. Projection-specific modulation of

- 551 dopamine neuron synapses by aversive and rewarding stimuli. *Neuron* **70**, 855–862 (2011).  
552  
553 56. Vertes, R. P. Differential projections of the infralimbic and prelimbic cortex in the rat.  
554 *Synapse* **51**, 32–58 (2004).  
555  
556 57. Beier, K. T. *et al.* Circuit Architecture of VTA Dopamine Neurons Revealed by  
557 Systematic Input-Output Mapping. *Cell* **162**, 622–634 (2015).



**Figure 1**

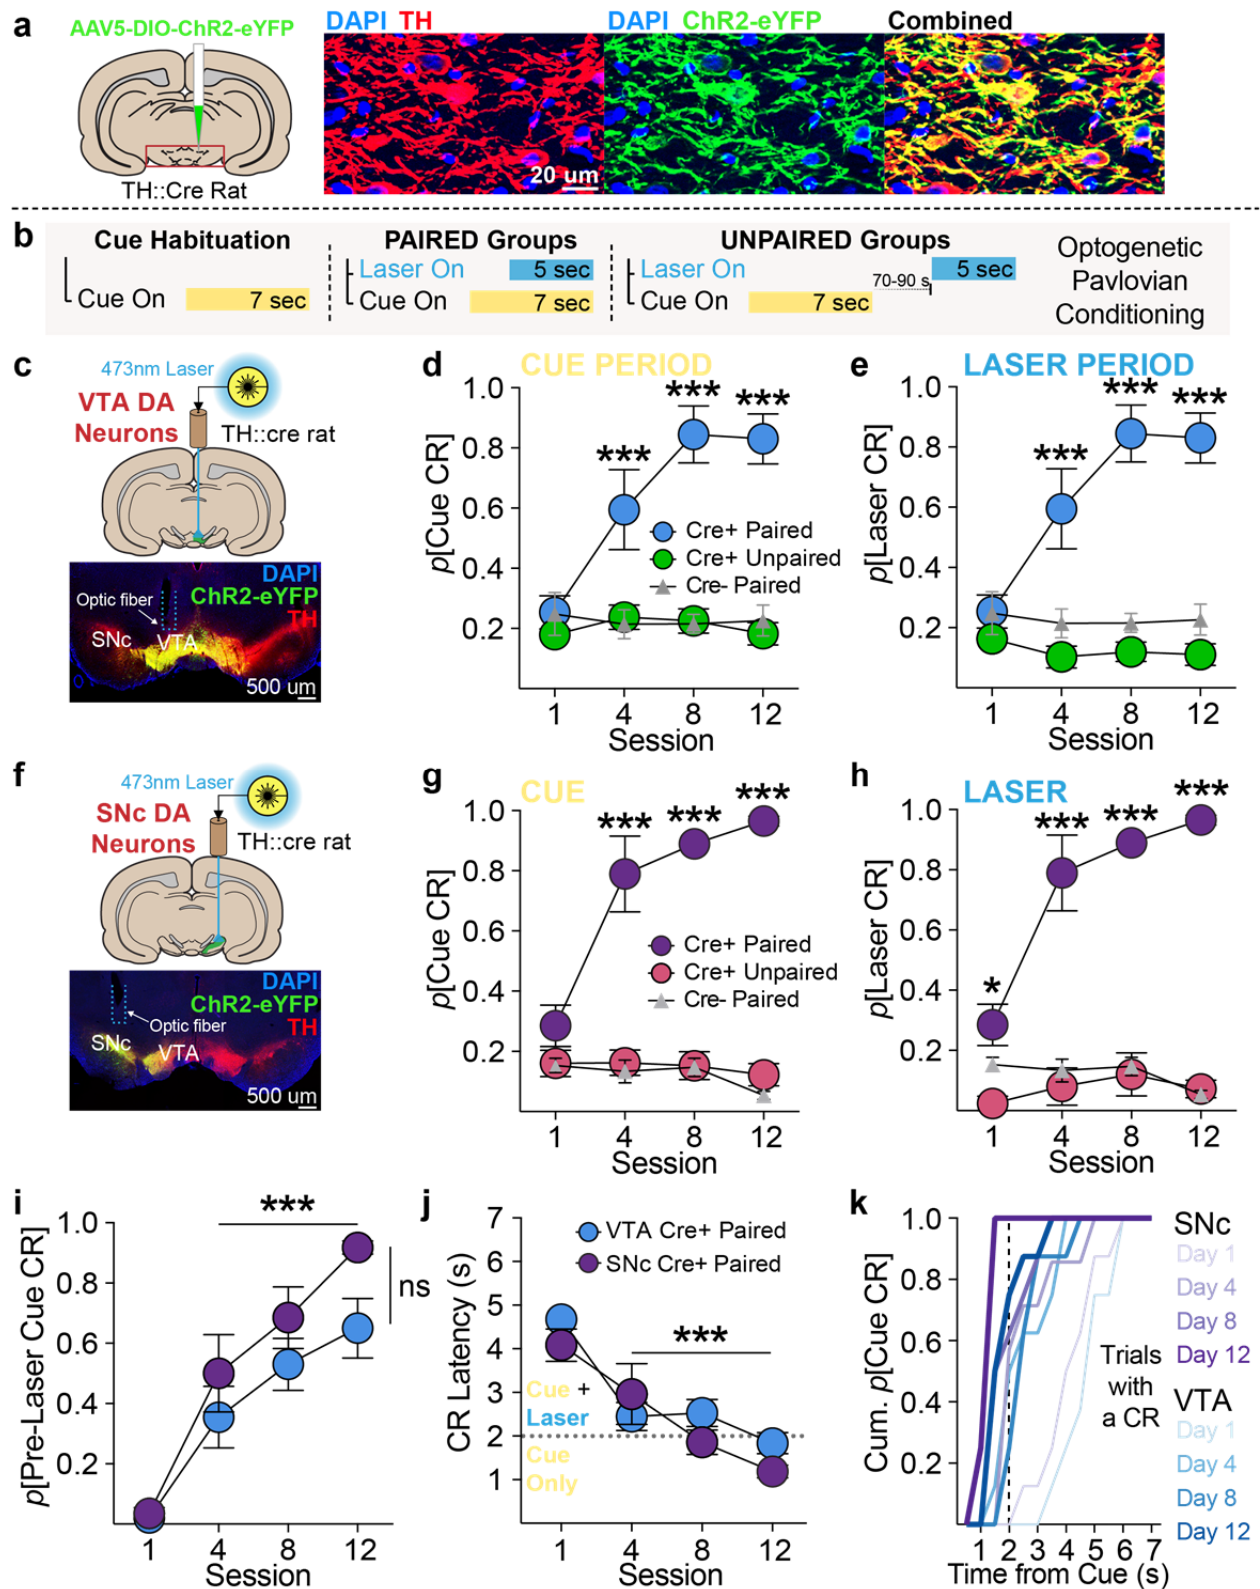

559 **Figure 1. Dopamine neurons uniformly instantiate conditioned value in previously neutral**  
560 **stimuli. (a)** ChR2 was expressed in TH+ (dopamine) neurons in TH-cre rats. **(b)** Schematic of  
561 optogenetic Pavlovian conditioning task. After habituation to a novel, neutral cue, paired groups  
562 received cue and laser (473-nm) presentations that overlapped in time. Unpaired groups  
563 received cue and laser presentations separated in time by an average of 80 s. **(c)** Targeting  
564 ChR2-eYFP to TH+ neurons in the VTA. **(d)** Across training, conditioned responses (CRs;  
565 locomotion) emerged during the 7-s cue period for VTA cre+ paired rats (n=8), but not cre+  
566 unpaired (n=8) or cre- paired (n=6) controls ( $p$ =probability; 2-way repeated measures (RM)  
567 ANOVA, session X group interaction,  $F_{(6,57)}=11.85$ ,  $p<0.0001$ ; Bonferroni-corrected post hoc  
568 comparisons with Unpaired and cre- groups). **(e)** CRs did not emerge in unpaired or cre-  
569 controls during the 5-s laser period, compared to cre+ paired rats (2-way RM ANOVA, session  
570 X group interaction,  $F_{(6,57)}=14.43$ ,  $p<0.0001$ ; post hoc comparisons with unpaired and cre-  
571 groups). **(f)** Targeting ChR2-eYFP to TH+ neurons in the SNc. **(g)** Cues evoked robust CRs in  
572 SNc cre+ cue-paired (n=8) rats, but not in unpaired (n=5) or cre- (n=5) controls (2-way RM  
573 ANOVA, session X group interaction,  $F_{(6,48)}=13.47$ ,  $p<0.0001$ ; post hoc comparisons with  
574 unpaired and cre- groups). **(h)** CRs did not emerge for SNc cre+ unpaired or cre- controls  
575 during the laser period, compared to cre+ paired rats (2-way RM ANOVA, session X group  
576 interaction,  $F_{(6,48)}=12.32$ ,  $p<0.0001$ ; post hoc comparisons with unpaired and cre- groups). **(i)**  
577 For VTA and SNc cre+ paired rats, across training, the majority of CRs were initiated in the 2 s  
578 after cue onset but before laser onset (2-way RM ANOVA, main effect of session,  $F_{(3,42)}=53.16$ ,  
579  $p<0.0001$ ; post hoc comparisons with day 1), indicating they were cue, rather than laser,  
580 evoked. **(j)** Accordingly, the latency of CR onset for cre+ paired rats decreased across training  
581 (2-way RM ANOVA, main effect of session  $F_{(3,42)}=27.09$ ,  $p<0.0001$ ; post hoc comparisons with  
582 day 1). **(k)** On trials in which a CR occurred, the cumulative probability of CR occurrence at  
583 each second during the 7-sec cue presentations. CRs emerged earlier in the cue period across  
584 training for both VTA and SNc cre+ paired groups. \* $p<0.05$ ; \*\*\* $p<0.001$ .

585

586

**Figure 2**

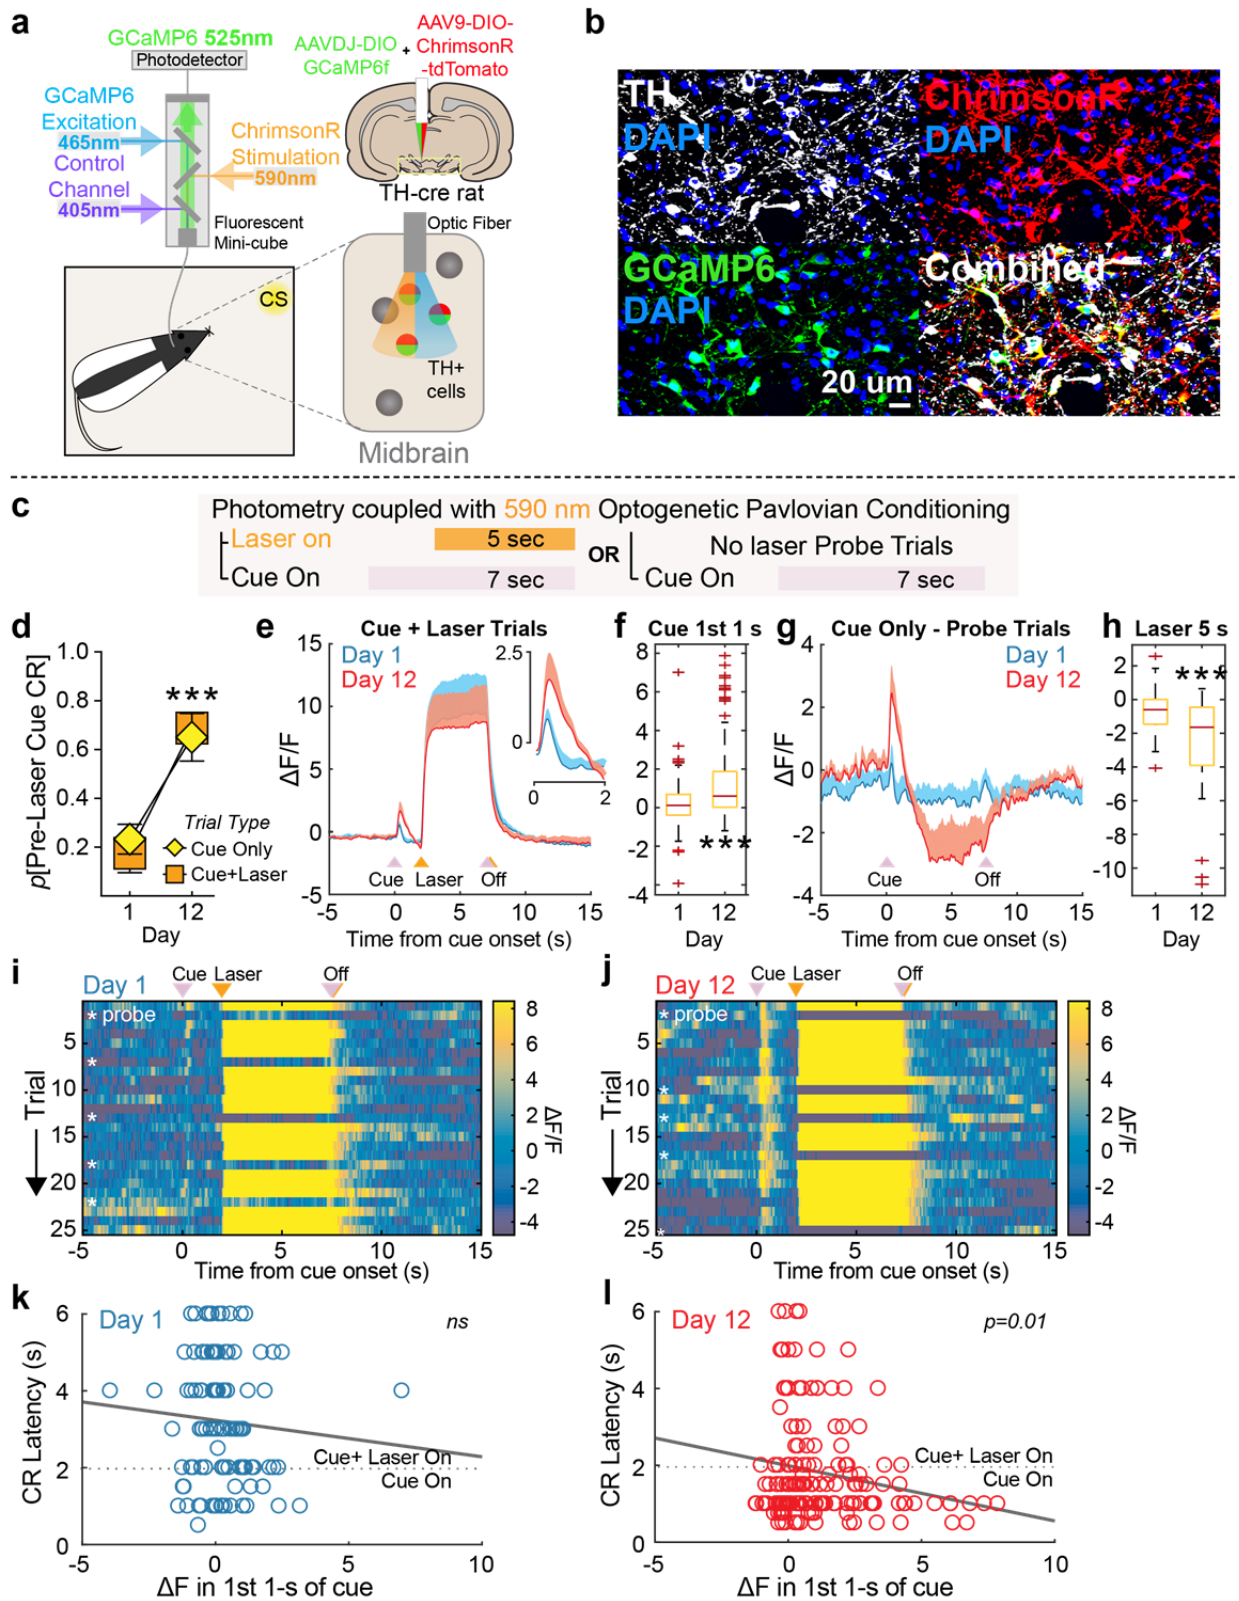

588 **Figure 2. Dopamine neurons develop phasic excitations in response to cues that predict**  
589 **their activation. (a)** Schematic of fiber photometry system. Fiber photometry fluorescence  
590 measurements and optogenetic stimulation in the same dopamine neurons was achieved by co-  
591 transfecting TH+ neurons with DIO-GCaMP6f and DIO-ChrimsonR containing AAV vectors. **(b)**  
592 ChrimsonR and GCaMP6f co-expression in the same TH+ neurons in midbrain. **(c)** Fiber  
593 photometry measurements were made during optogenetic Pavlovian conditioning where neutral  
594 cues were paired with orange laser for activation of dopamine neurons. Probe trials were  
595 included, where laser was omitted. **(d)** Cues paired with optogenetic activation of VTA  
596 dopamine neurons with ChrimsonR (n=3) develop conditioned stimulus properties to evoke  
597 conditioned responses (CRs) across training, similar to ChR2 experiments. Cue-evoked CRs on  
598 laser-omitted probe trials were no different than laser-paired trials. **(e)** Phasic activity in  
599 dopamine neurons in response to dopamine-neuron-activation-paired cues (inset) developed  
600 across Pavlovian training, shown as  $\Delta F/F$ , while the laser-evoked response remained stable. **(f)**  
601 Summary of normalized  $\Delta F/F$  response during the 1<sup>st</sup> 1 s of cue presentations in laser-paired  
602 trials (box and whisker plot,  $t_{(382)}=8.19$ ,  $p < 0.001$ ). **(g)** On cue probe trials, a decrease in activity  
603 was measured during the period of normal laser delivery. **(h)** Summary of normalized  $\Delta F/F$   
604 response during the 5 s period when laser was omitted on probe trials (box and whisker  
605 plot,  $t_{(62)}=-4.15$ ,  $p < 0.001$ ). **(i and j)** Trial by trial heatmaps for a representative rat during Day 1 **(i)**  
606 and 12 **(j)** of conditioning. Cue, laser, and laser-omission related responses were evident on  
607 Day 12. **(k)** Scatterplot of the relationship between conditioned response latency on individual  
608 trials and change in fluorescence measured in the first 1 s after cue presentation, compared to  
609 the 1 s period before cue onset. A significant negative relationship emerged later in training, **(l)**  
610 where larger changes in fluorescence during the 1<sup>st</sup> 1-s of the cue occurred on trials where rats  
611 initiated conditioned behavior faster ( $R^2= 0.14$ ,  $p=0.012$ ).

612

**Figure 3**

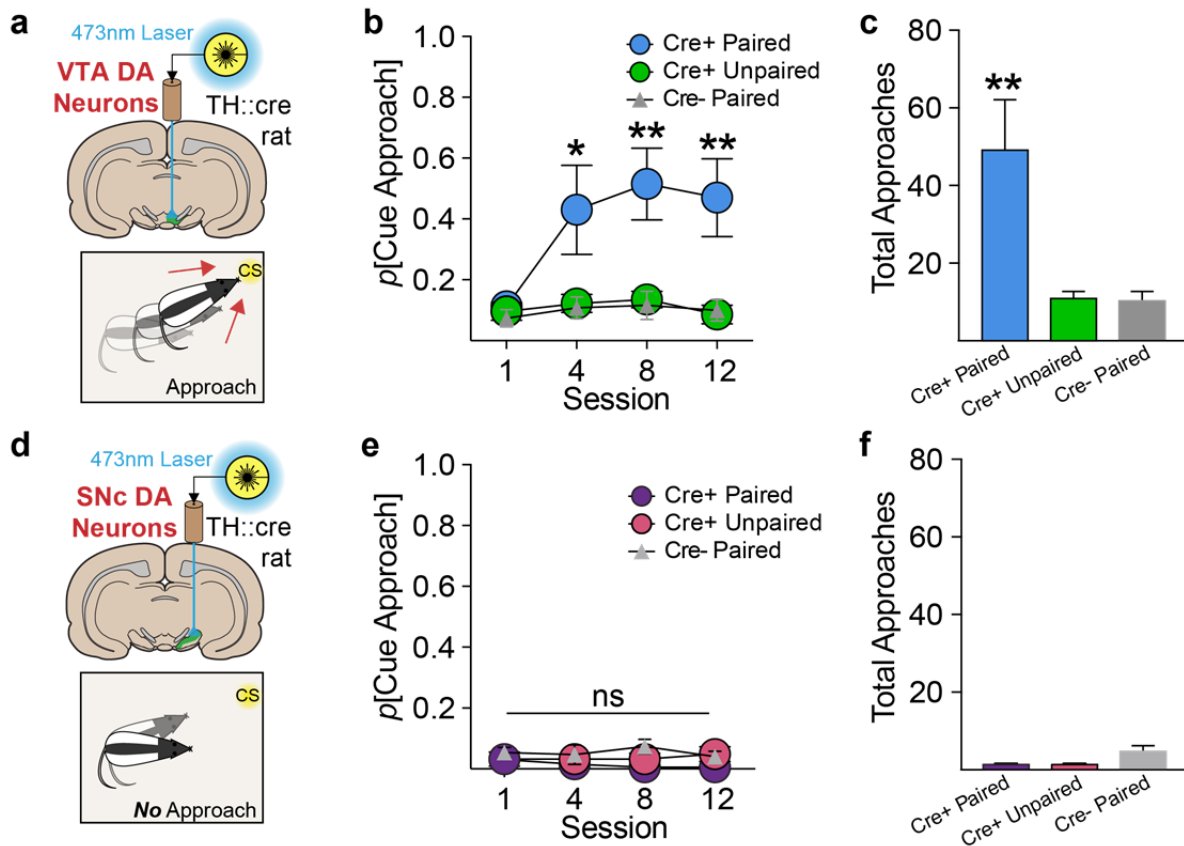

613

614 **Figure 3. VTA, but not SNc dopamine neurons create incentive stimuli. (a)** VTA dopamine-  
 615 paired cues support cue approach/interaction. **(b)** Approach and interaction with the visual cue  
 616 associated with optogenetic stimulation developed for VTA cre+ paired rats, but not control  
 617 groups (2-way RM ANOVA, session X group interaction,  $F_{(6,57)}=2.304$ ,  $p<0.05$ ; post hoc  
 618 comparisons with unpaired and cre- groups). **(c)** VTA cre+ paired rats made significantly more  
 619 total cue approaches across training, compared to controls (1-way ANOVA, main effect of  
 620 group,  $F_{(6,57)}=8.394$ ,  $p<0.001$ ; post hoc comparisons with unpaired and cre- groups). **(d)** SNc  
 621 dopamine-paired cues do not support approach. **(e)** In contrast to the VTA group, cue approach  
 622 did not develop for cre+ paired SNc rats, relative to controls (2-way RM ANOVA, no session X  
 623 group interaction,  $F_{(6,48)}=0.637$ ,  $p=0.7$ ). **(f)** SNc groups made almost zero total approaches  
 624 across training.

625

626

627  
628

**Figure 4**

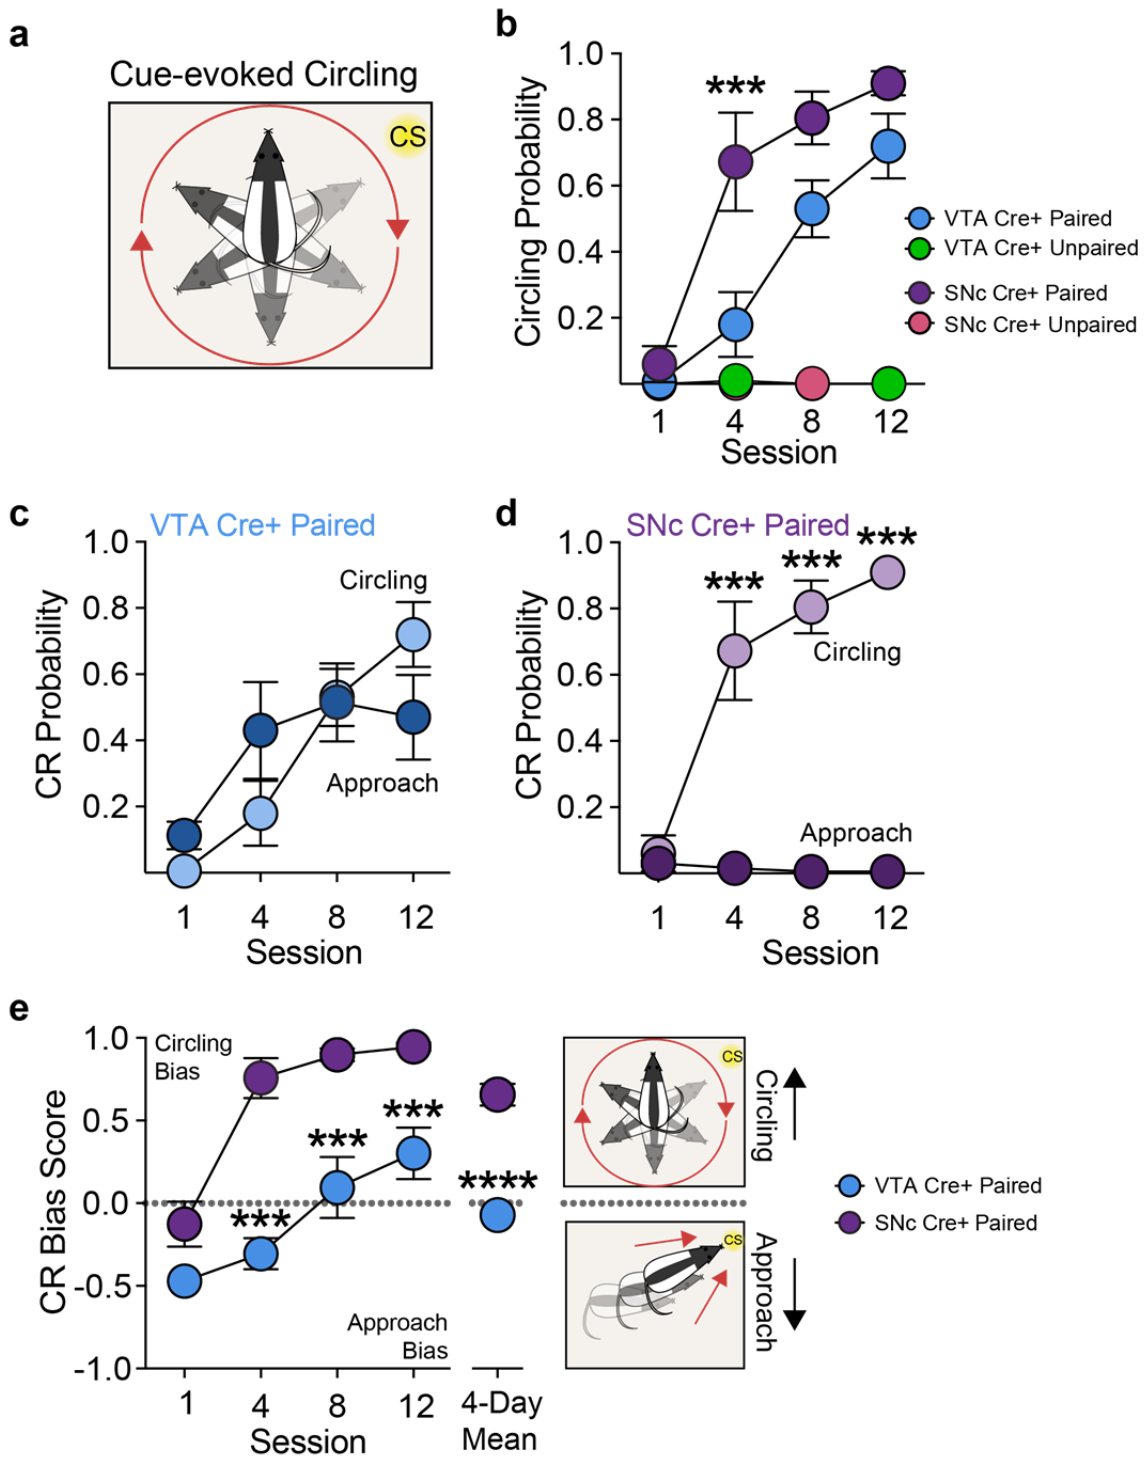

629  
630

631 **Figure 4. Pavlovian cues paired with phasic activation of SNc dopamine neurons**  
632 **preferentially promote vigorous movement. (a)** Cartoon of conditioned circling behavior,  
633 which was defined as a turn of at least 360 degrees. **(b)** SNc cre+ paired, but not unpaired rats  
634 developed cue-evoked circling. VTA cre+ paired, but not unpaired rats also developed circling,  
635 but later in training, compared to SNc rats (2-way RM ANOVA, interaction of group x session,  
636  $F_{(3,42)}=3.689$ ,  $p=0.019$ ; main effect of group,  $F_{(1,14)}=7.98$ ,  $p=0.0135$  post hoc test between SNc  
637 and VTA cre+ paired groups). **(c)** Cue-evoked approach and cue-evoked circling emerged in  
638 different patterns across Pavlovian training for VTA cre+ paired rats (2-way RM ANOVA,  
639 interaction of CR type x session,  $F_{(3,21)}=4.341$ ,  $p=0.016$ ), but both CRs were expressed at similar  
640 levels overall (2-way RM ANOVA, no effect of CR type,  $F_{(1,7)}=0.279$ ,  $p=0.614$ ). **(d)** Only cue-  
641 evoked circling developed for SNc cre+ paired rats, which was expressed exclusively on nearly  
642 every trial by the end of training (2-way RM ANOVA, interaction of CR type x session,  
643  $F_{(3,21)}=30.88$ ,  $p<.0001$ ; post hoc comparison between CR types). **(e)** To quantify rats'  
644 approach/circling bias, a CR Score was calculated, consisting of  $(X + Y)/2$ , where Response  
645 Bias,  $X$ , =  $(\# \text{ of turns} - \# \text{ of approaches})/(\# \text{ of turns} + \# \text{ of approaches})$ , and Probability  
646 Difference,  $Y$  =  $(p[\text{circling}] - p[\text{approach}])$ . Across training, VTA and SNc cre+ paired rats  
647 displayed different conditioned response patterns. VTA rats transitioned from an initial approach  
648 bias to a mixed approach/circling score, while SNc rats showed an early and stable circling bias  
649 (2-way RM ANOVA, interaction of group x session,  $F_{(3,42)}=3.933$ ,  $p=0.015$ ); post hoc comparison  
650 between groups; unpaired 2-tailed t test on 4-day mean,  $t_{14}=7.287$ ,  $p<0.0001$ ). \*\*\* $p< 0.001$ .  
651 \*\*\*\* $p< 0.0001$ .

652

653

## Figure 5

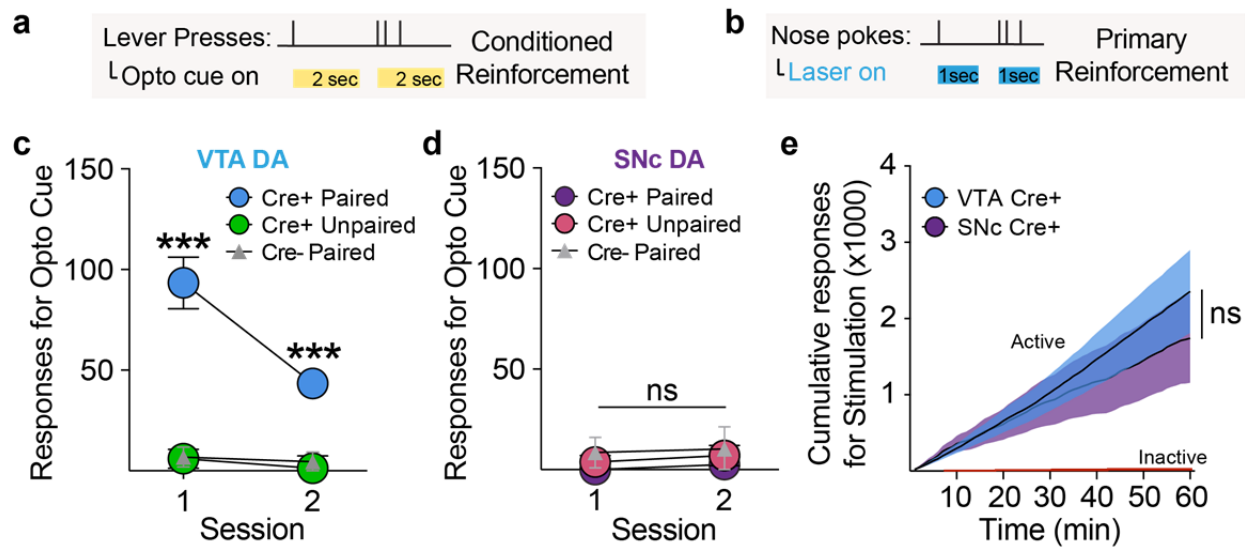

654

655 **Figure 5. VTA and SNc dopamine neurons differentially create conditioned, but not**  
656 **primary, reinforcement. (a)** Conditioned reinforcement test, where lever presses produced the  
657 cue previously paired with dopamine neuron stimulation, but no laser. **(c)** VTA cre+ paired rats  
658 made instrumental responses for cue presentations in the absence of laser, relative to controls  
659 (2-way RM ANOVA, main effect of group,  $F_{(2,19)}=27.18$ ,  $p<0.0001$ ; post hoc comparisons with  
660 unpaired and cre- groups). **(d)** SNc cre+ paired rats did not respond for cue presentations,  
661 relative to controls (2-way RM ANOVA, no effect of group,  $F_{(2,16)}=1.407$ ,  $p=0.274$ ). **(b)** Primary  
662 reinforcement test, where nose pokes responses produced optogenetic stimulation of dopamine  
663 neurons. **(e)** VTA ( $n=16$ ) and SNc ( $n=13$ ) cre+ rats made a similar number of instrumental  
664 responses for dopamine neuron activation (2-way RM ANOVA, no effect of group,  $F_{(1,27)}=0.227$ ,  
665  $p=0.638$ ). \*\*\* $p<0.001$ .

666

667



**Figure 6**

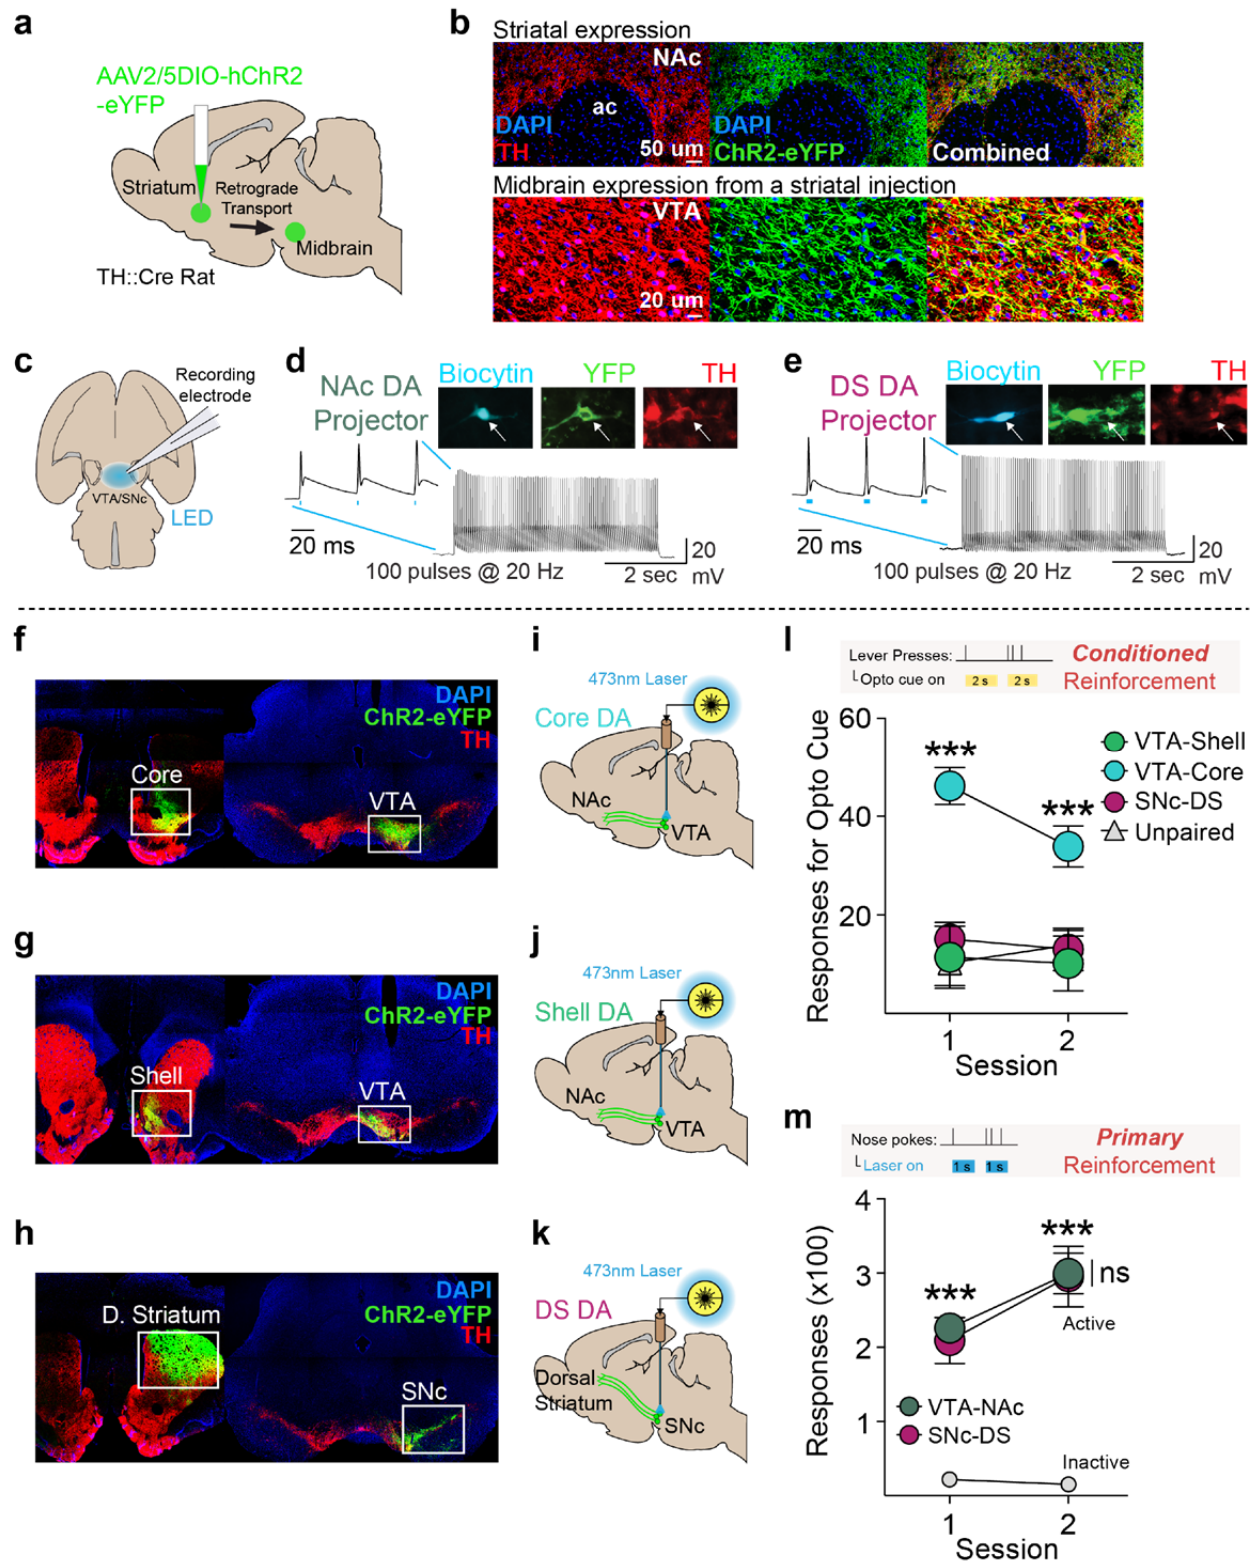

669 **Figure 6. Nucleus accumbens core, but neither accumbens shell nor dorsal striatal**  
670 **projecting dopamine neurons create incentive stimuli. (a)** Viral strategy for targeting specific  
671 dopamine projections via retrograde AAV-DIO-ChR2 transport. **(b)** Transfection in striatum of  
672 TH-cre rats led to robust expression of ChR2-eYFP in TH+ cells in the midbrain. **(c)**  
673 Retrogradely-targeted neurons in the VTA and SNc were recorded in an *ex vivo* preparation. **(d)**  
674 Example ChR2 retrogradely transfected nucleus accumbens-projecting dopamine neuron  
675 showed high fidelity spike trains in response to a 5-s, 100-pulse, 20-Hz stimulation. **(e)** Example  
676 retrogradely transfected DS-projecting dopamine neuron also showed high fidelity spike trains in  
677 response to blue LED pulses. **(f)** Injections targeted to the NAc core resulted in expression in  
678 VTA. **(g)** Injections targeted to the NAc shell resulted in expression in the VTA. **(h)** Injections  
679 targeted to the DS resulted in expression in the SNc. Optic fibers were implanted over the VTA  
680 or SNc for selective optogenetic stimulation of **(i)** NAc core, **(j)** NAc shell, or **(k)** DS-projecting  
681 dopamine neurons. **(l)** In a test of conditioned reinforcement for an optogenetically-conditioned  
682 Pavlovian cue, VTA-Core<sup>TH</sup> cre+ paired rats (n=9) responded robustly for cue presentations,  
683 relative to VTA-Shell<sup>TH</sup> cre+ paired (n=7) and SNc-DS<sup>TH</sup> cre+ paired rats (n=9), while VTA-  
684 Shell<sup>TH</sup> paired and SNc-DS<sup>TH</sup> paired rats were no different from unpaired (n=9) controls (2-way  
685 repeated measures ANOVA, main effect of group,  $F_{(3,30)}=13.08$ ,  $p<0.0001$ ; post hoc  
686 comparisons between groups). **(m)** In a test of primary reinforcement, however, VTA-NAc<sup>TH</sup>  
687 (n=11) and SNc-DS<sup>TH</sup> (n=8) groups made a similar number of responses for optogenetic  
688 stimulation (2-way RM ANOVA, no effect of group,  $F_{(1,17)}=0.106$ ,  $p=0.749$ ; post hoc comparison  
689 relative to inactive responses). \*\*\* $p<0.001$ .  
690  
691

692

## Figure S1

a

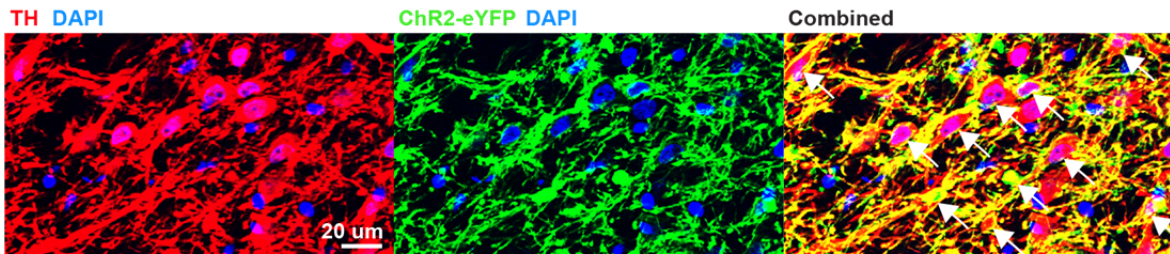

b

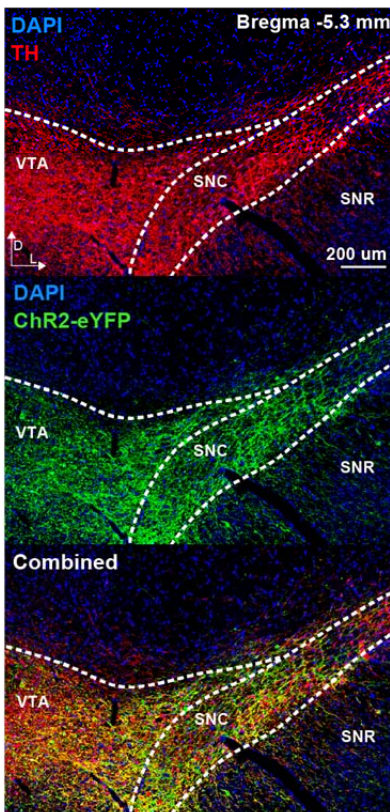

c

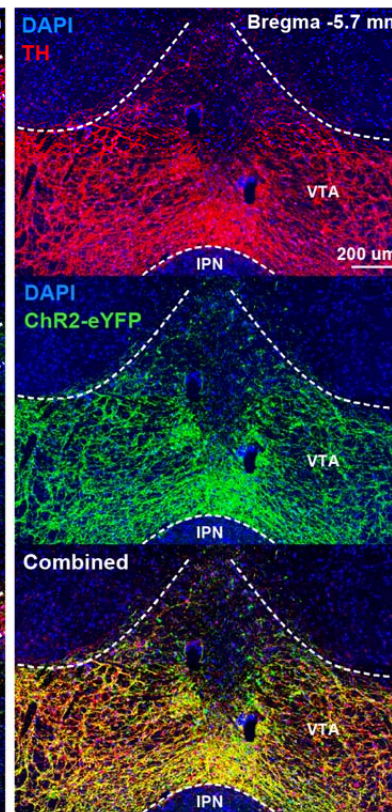

d

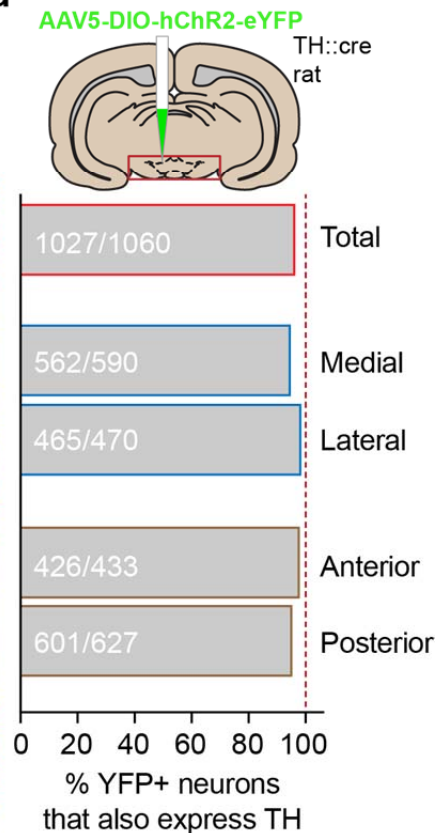

693

694

695 **Supplementary Figure 1. Highly specific targeting of ChR2-eYFP to TH+ neurons in TH-**  
696 **cre rats. (a)** Injection of a cre-dependent ChR2-eYFP AAV vector resulted in targeting of ChR2-  
697 eYFP to TH+ neurons in the (b) SNc and (c) VTA. (d) Targeting specificity was high (96.9%;  
698 1027 TH+/1060 eYFP+ neurons counted) across medial/lateral and anterior/posterior sections  
699 of the midbrain.

**Fig. S2**

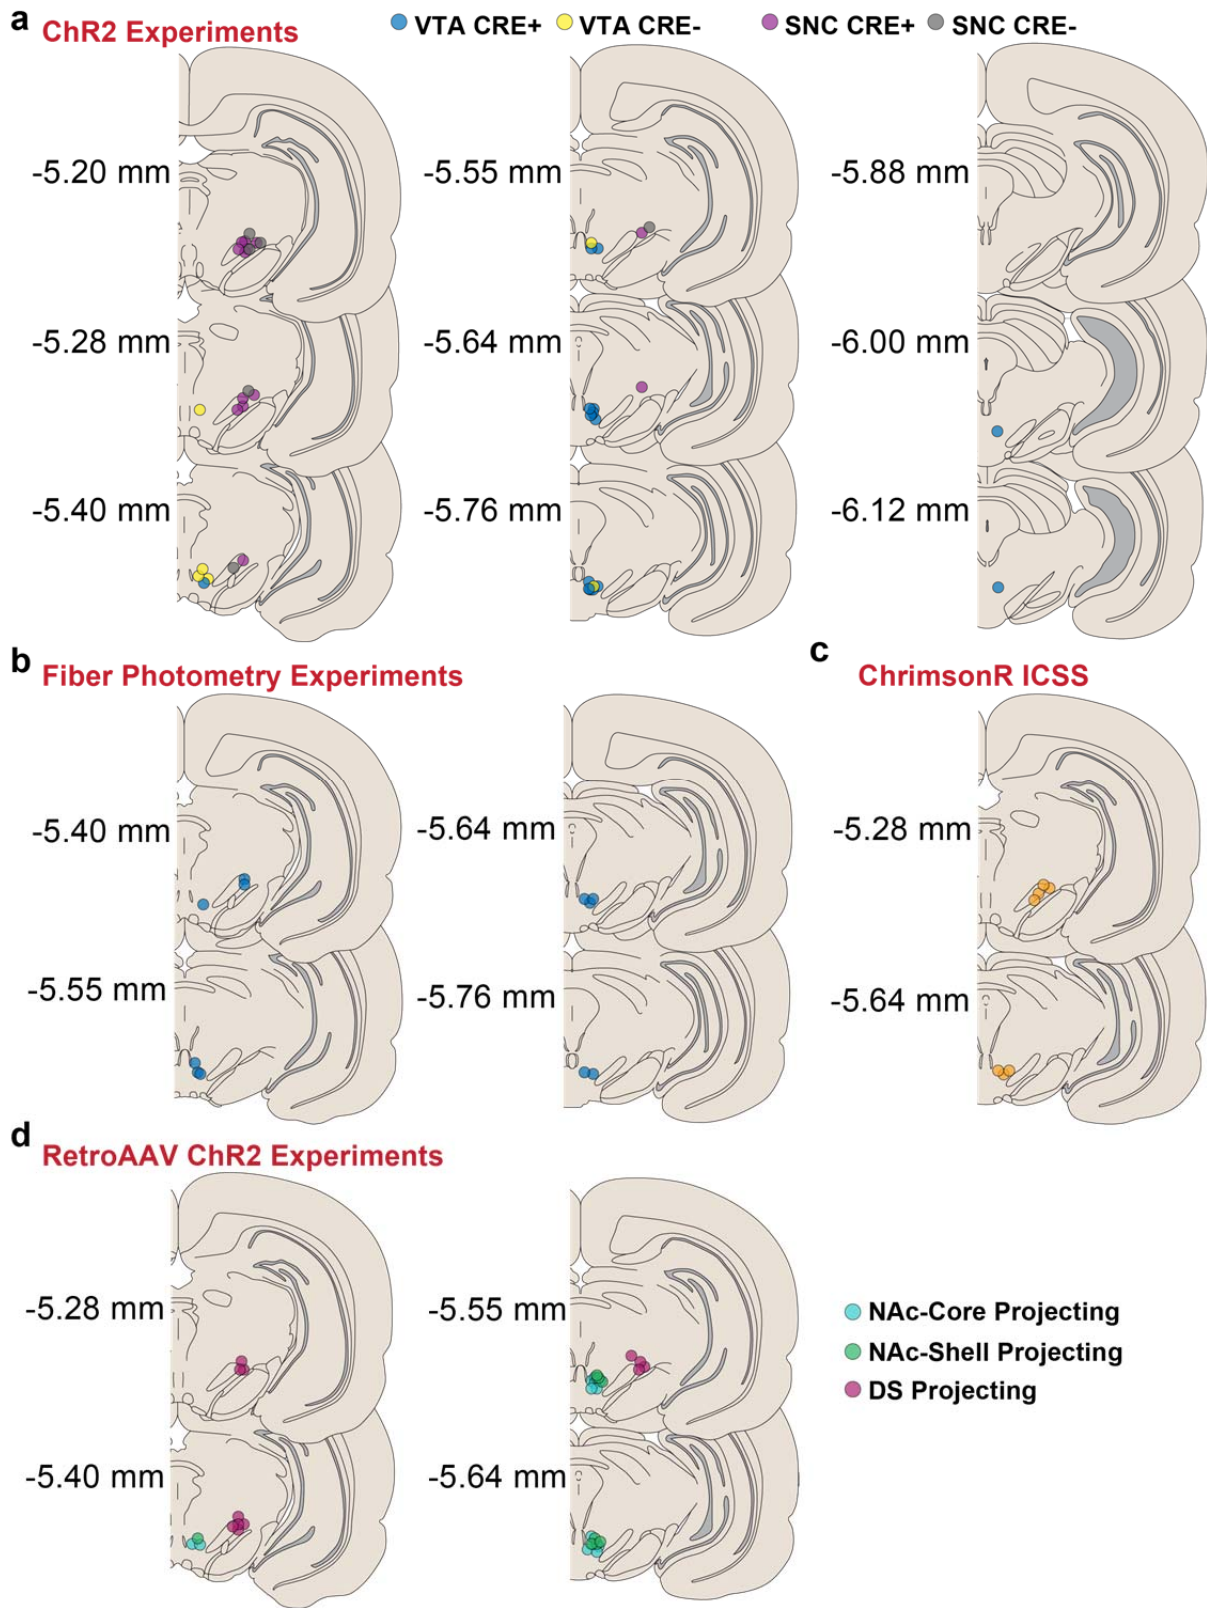

701 **Supplementary Figure 2. Optic fiber placements.** Coronal plates showing the location of  
702 optic fiber tips relative to Bregma for TH-cre+ and cre- control rats in the **(a)** ChR2 experiments,  
703 **(b)** fiber photometry experiments, **(c)** ChrimsonR intracranial self-stimulation, and **(d)** Projection-  
704 specific ChR2 experiments.

**Fig. S3**

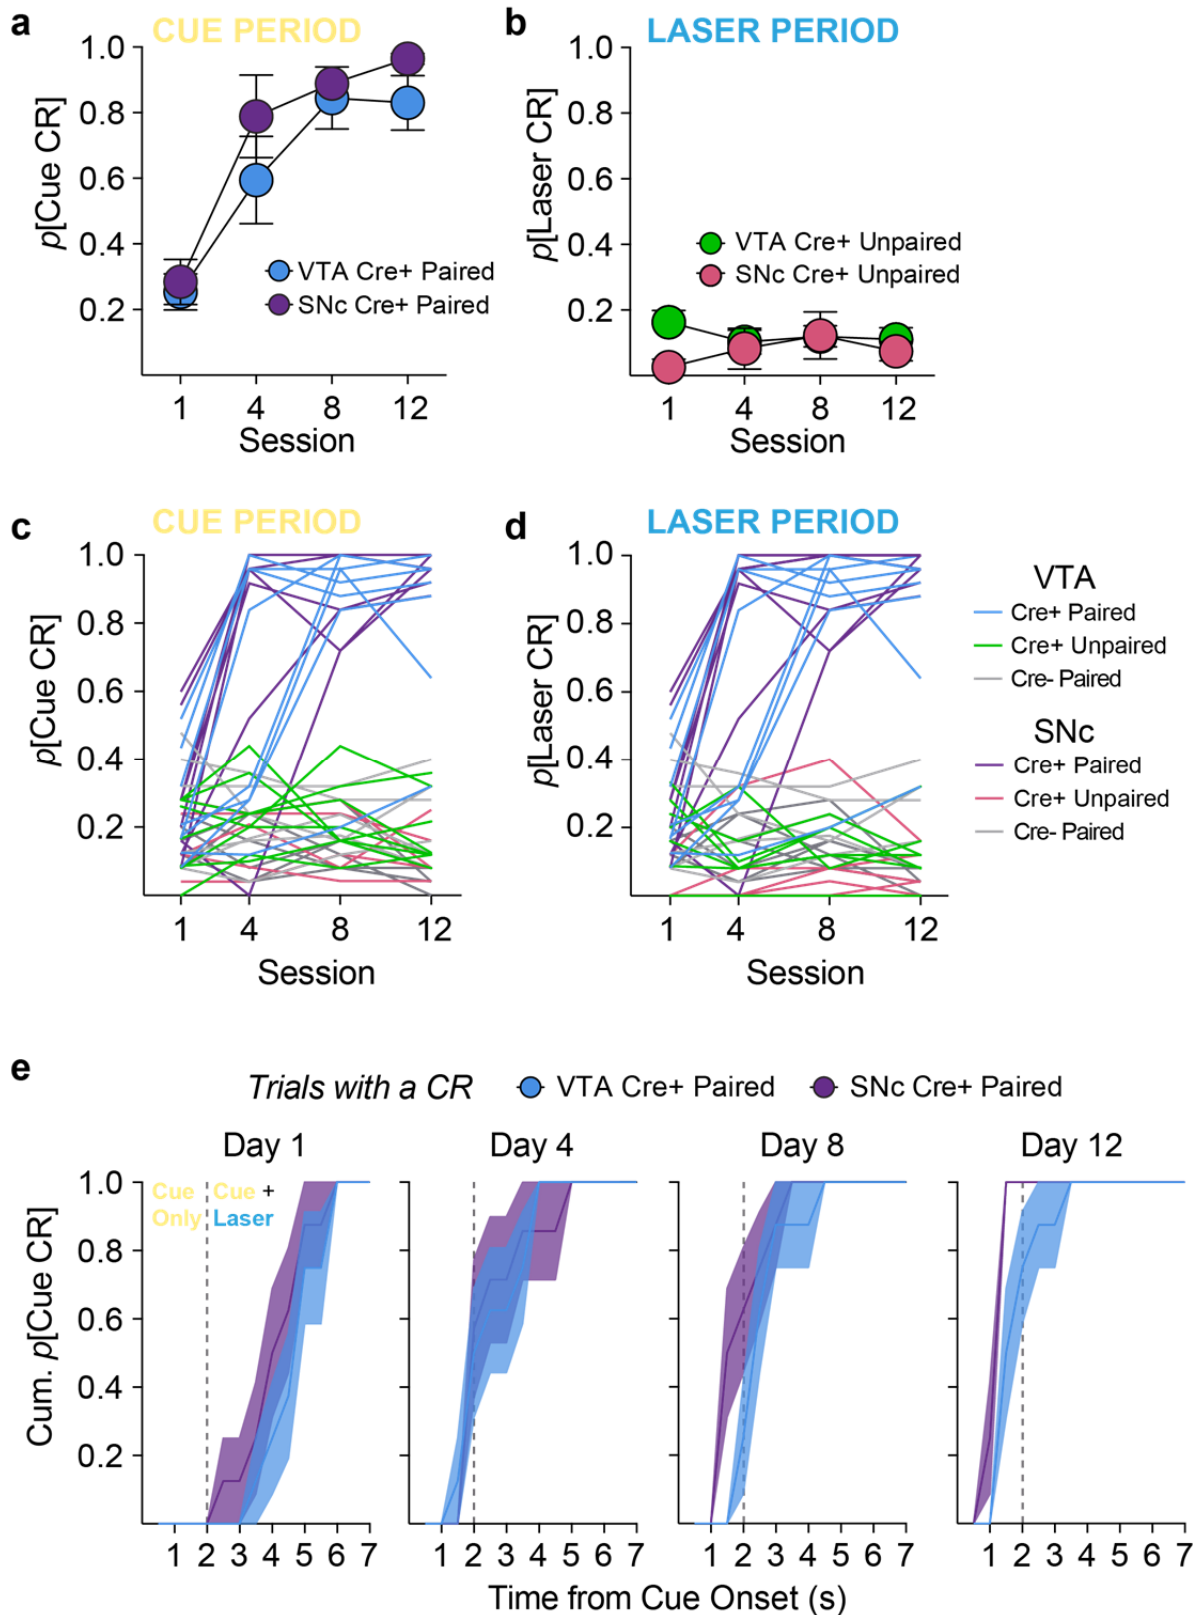

706 **Supplementary Figure 3. Acquisition of Pavlovian conditioned responses.** (a) VTA and  
707 SNc cre+ paired rats learned conditioned responses during the cue period at the same rate (2-  
708 way repeated measures ANOVA, no interaction,  $F_{(3,42)}=0.691$ ,  $p=0.563$ ). (b) Neither VTA nor  
709 SNc cre+ unpaired rats developed conditioned responses during the laser period. (c) Learning  
710 curves for individual rats in all groups during the cue period. (d) Learning curves for individual  
711 rats in all groups during the laser period. (e) The average cumulative probability of CR  
712 occurrence for VTA and SNc paired rats within 7-sec cue periods across training. VTA and SNc  
713 rats acquire CRs rapidly, and CRs emerged earlier in the cue period as training progressed.  
714

**Fig. S4**

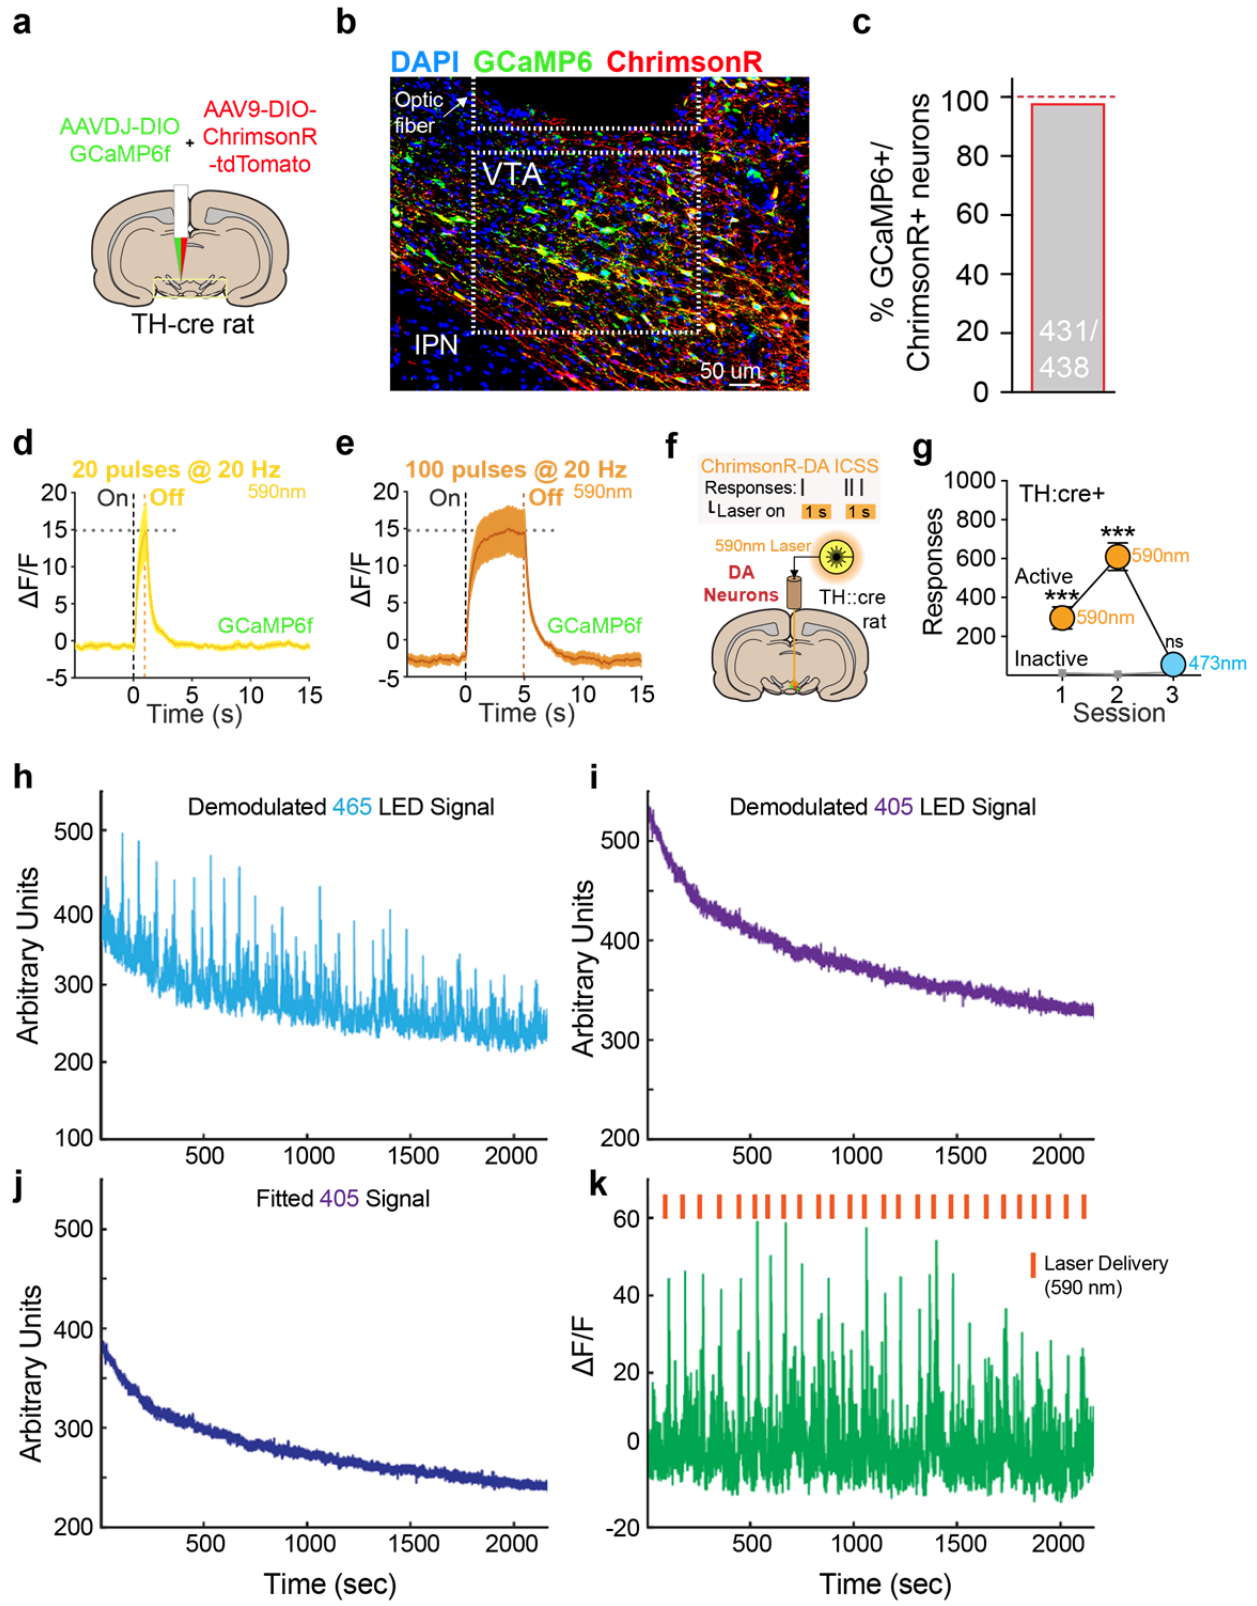



716 **Supplementary Figure 4. Fiber photometry validation and analysis. (a)** Cre-driven AAVs  
717 containing GCaMP6f and ChrimsonR were co-injected into the midbrain in TH-cre rats. **(b and**  
718 **c)** This led to 98.4% GCaMP6/ChrimsonR co-expression in TH+ within the recording area below  
719 optic fiber placements. **(d and e)** Delivery of 20 or 100 5-ms 590-nm laser light pulses resulted  
720 in rapid increases in GCaMP6f fluorescence (depicted as  $\Delta F/F$ , the change in fluorescence  
721 during the stimulation period over baseline,  $n = 5$  rats) that showed stable peak levels, and rapid  
722 offset. **(f)** Intracranial self-stimulation was used to assess the effectiveness of ChrimsonR  
723 activation to support behavior. **(g)** ChrimsonR activation via 590-nm laser delivery to dopamine  
724 neurons in the midbrain supported robust self-stimulation behavior ( $n=7$ ), measured as nose  
725 pokes, that rapidly extinguished when a 473-nm laser was substituted (2-way repeated  
726 measures ANOVA, session X response type interaction,  $F_{(2,12)}=37.27$ ,  $p<0.0001$ ; post hoc  
727 comparisons with inactive responses). **(h)** Example whole session trace of the demodulated  
728 465-nm LED signal. **(i)** Example whole session trace of the demodulated 405-nm LED signal. **(j)**  
729 Trace shown in **(i)** after applying a least-squares fit. **(k)** Normalized 465 signal ( $\Delta F/F$ ) = (465-  
730 nm signal – fitted 405-nm signal)/(fitted 405-nm signal). Laser-evoked fluorescence is denoted  
731 by the orange bars.  
732

## Fig. S5

a

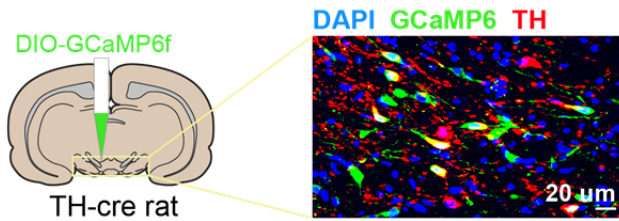

b

Photometry coupled with sucrose-cue conditioning

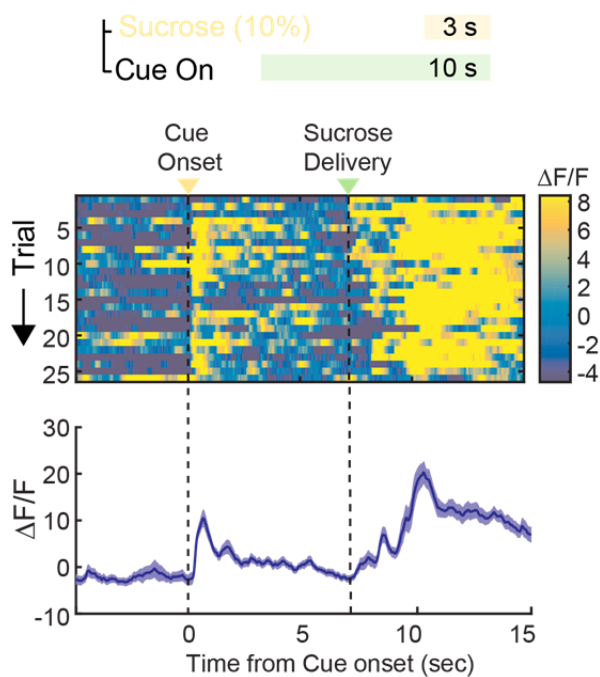

733

734

735 **Supplementary Figure 5. Fiber photometry in dopamine neurons during sucrose-cue**  
736 **conditioning. (a)** DIO-GCaMP6f was targeted to dopamine neurons in TH-cre (n=2) rats. **(b)**

737 After conditioning, sucrose-predictive cues evoked a rapid response in dopamine neurons,  
738 measured by change in GCaMP6f fluorescence over baseline. During sucrose consumption  
739 (right), dopamine neurons showed robust activity lasting several seconds.

740

741

**Fig. S6**

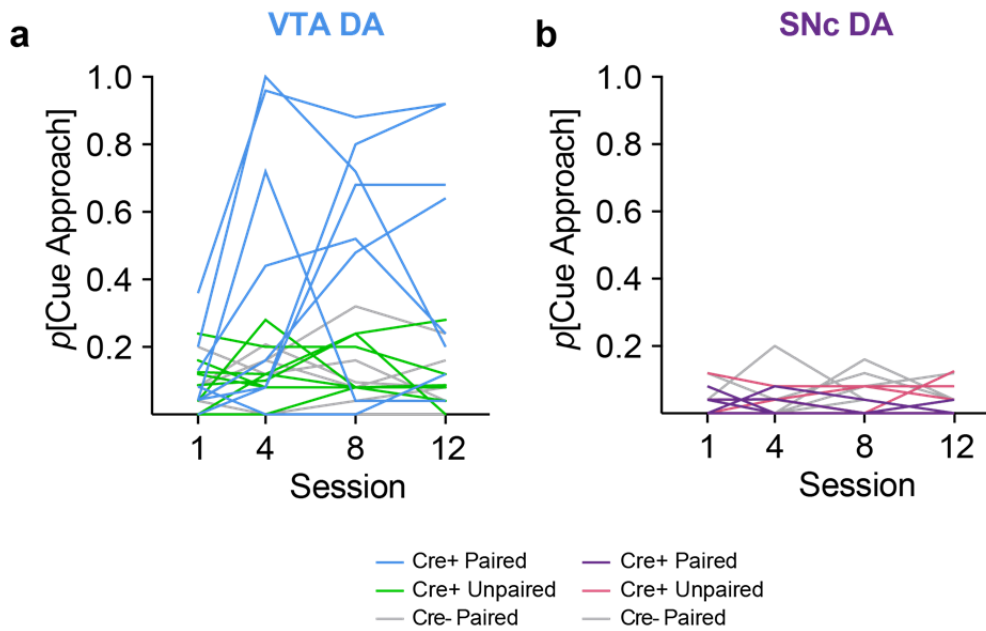

742

743

744 **Supplementary Figure 6. Acquisition of conditioned approach for individual rats. VTA**

745 cre+ paired rats developed (a) cue approach conditioned behavior, relative to cre+ unpaired and

746 cre- control groups. (b) No SNc cre+ paired rats developed cue approach.

747

748

749

**Fig. S7**

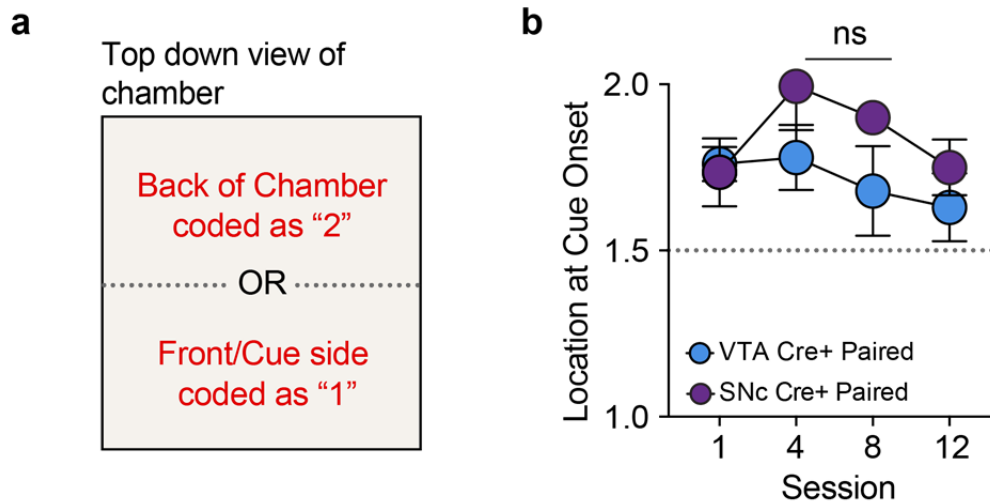

750

751

752 **Supplementary Figure 7. Proximity to cue location at cue onset is not related to cue**  
753 **approach probability. (a)** The location of each rat in the experimental chamber was recorded  
754 at the onset of each cue presentation. The average location at cue onset across training was  
755 determined by assigning a value of "1" to a trial if the rat was located on the side of the chamber  
756 containing the cue light, or a value of "2" to a trial if the rat was located in the back half of the  
757 chamber at cue onset. **(b)** The average location at cue onset for cre+ paired VTA and SNC rats  
758 did not differ, nor did it change across training (2-way RM ANOVA, no effect of group,  
759  $F_{(1,14)}=3.178$ ,  $p=0.0963$ ; no interaction,  $F_{(3,42)}=0.706$ ,  $p=0.554$ ).

760

761

**Fig. S8**

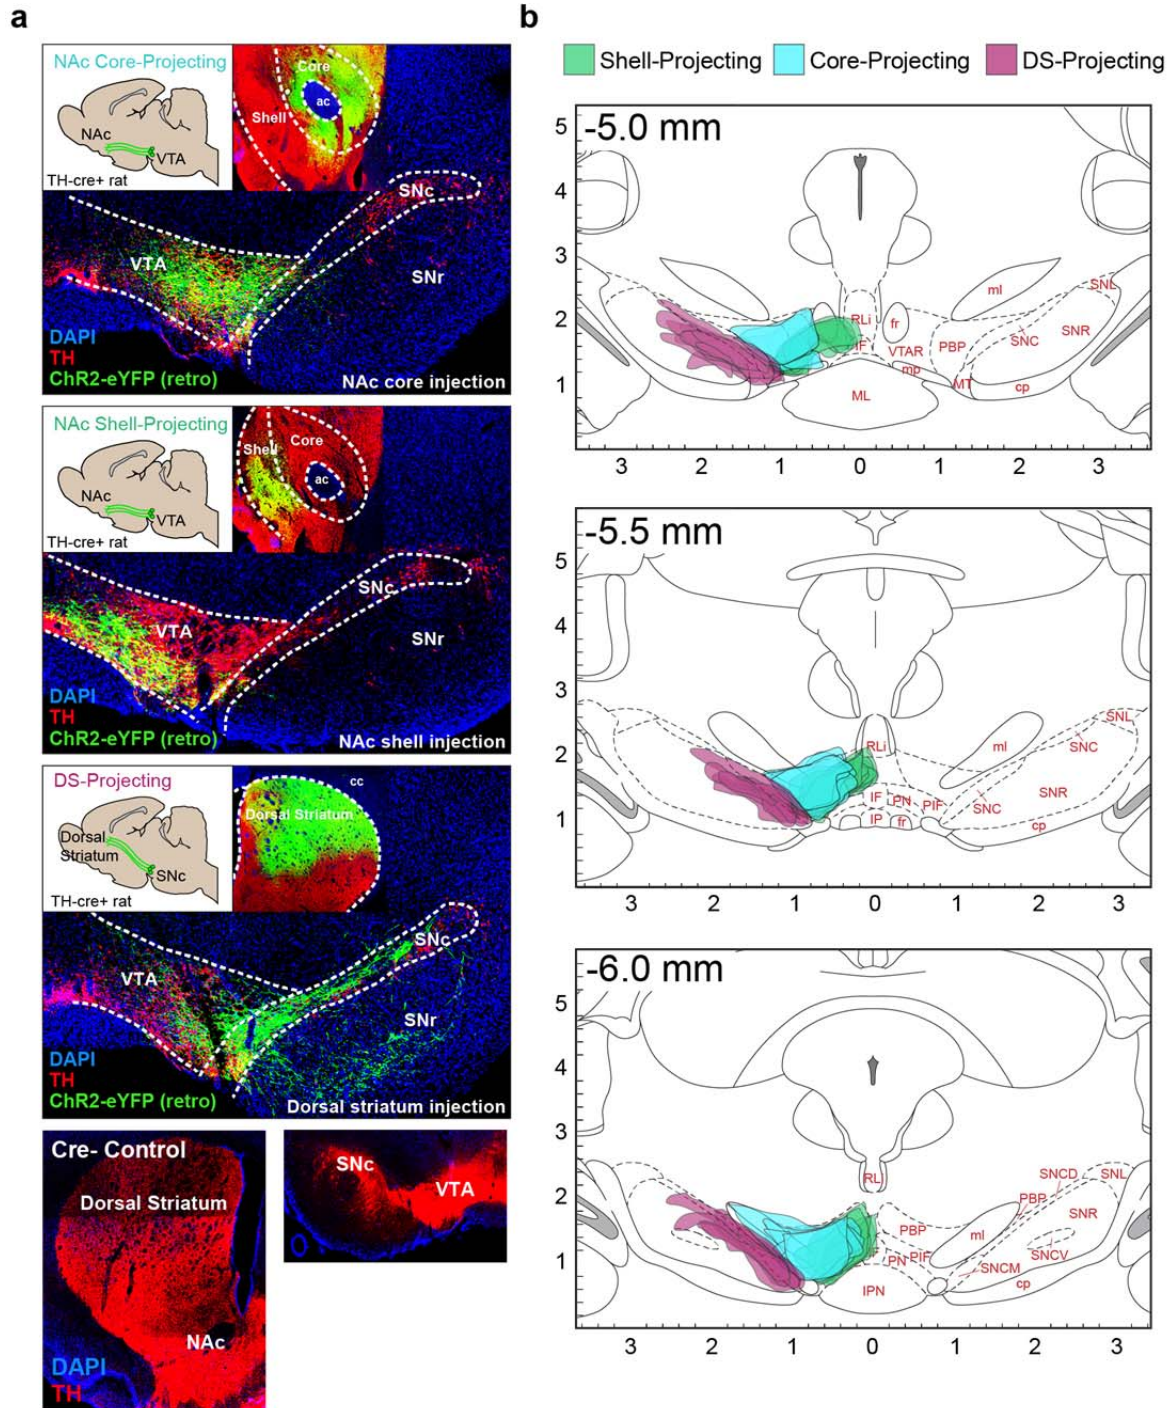

762

763

764 **Supplementary Figure 8. Retrograde targeting of dopamine neurons reveals projection-**  
765 **specific expression patterns in the midbrain. (a)** Transfection in striatum of TH-cre rats with  
766 a retrogradely transported DIO-ChR2-eYFP construct resulted in robust expression of ChR2-  
767 eYFP in TH+ cells in the midbrain, but the expression pattern varied according to striatal target.  
768 **(b)** Summary of expression patterns for NAc shell (n=5 rats, 6-10 slices per rat), NAc core  
769 (n=4), and dorsal striatum (n=5) projecting dopamine neurons. Shell projections were  
770 concentrated in the ventromedial VTA, while core projections were concentrated in the  
771 laterodorsal VTA. Projections to the dorsal striatum were localized throughout the SNc.  
772

**Fig. S9**

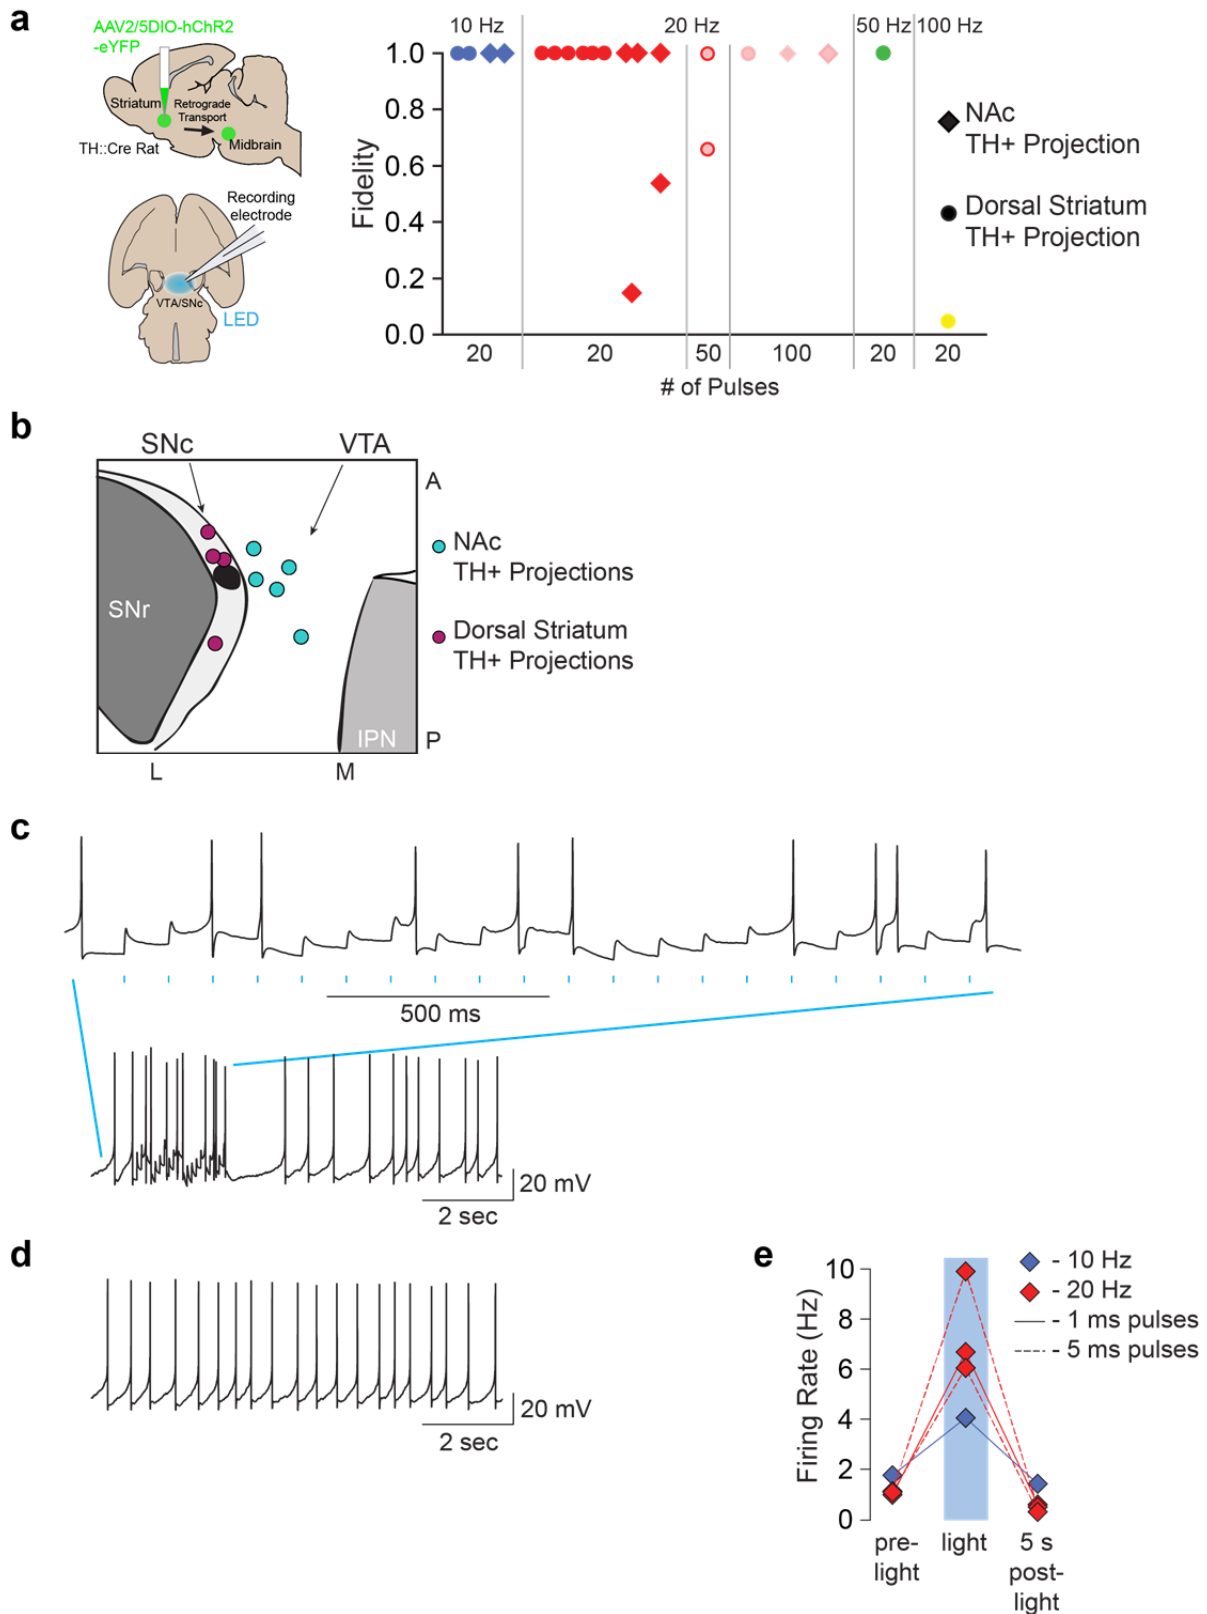

774 **Supplementary Fig. 9. Similar light-evoked responses in ventral and dorsal striatal**  
775 **projecting dopamine neurons. (a)** Among quiescent neurons, both NAc projectors and DS  
776 projectors showed high fidelity up to 50-Hz stimulation. Fidelity was observed in response to  
777 both 1-ms and 5-ms pulse trains. Each marker represents a cell, but some cells were tested  
778 with more than one frequency. **(b)** Summary of the locations of the recorded neurons in the  
779 horizontal slice. DS projectors were localized in the substantia nigra pars compacta (SNc) and  
780 NAc projectors were located in the VTA. **(c)** Example recording in a ChR2 expressing VTA  
781 neuron that was also firing spontaneously during recording. Although the LED light stimulation  
782 did increase the firing rate of the cell (lower panel), the increase in firing was not due to AP firing  
783 time-locked to the light pulses (upper panel). **(d)** Example spontaneous firing in the same cell,  
784 without light stimulation. **(e)** Summary of the impact of light pulses on spontaneously firing,  
785 ChR2 expressing neurons. While fidelity was moderate, stimulation did increase the firing rate in  
786 these cells.  
787  
788



789 **Methods**

790

791 Subjects: Male and female Th-cre transgenic rats (on a Long-Evans background) were used in  
792 these studies. These rats express Cre recombinase under the control of the tyrosine  
793 hydroxylase (TH) promoter in over 60% of all TH+ neurons in the midbrain<sup>8</sup>. Wild-type  
794 littermates (Th-cre-) were used as controls. After surgery rats were individually housed with ad  
795 libitum access to food and water on a 0700 to 1900 light/dark cycle (lights on at 0700). All rats  
796 weighed >250 g at the time of surgery and were 5-9 months old at the time of experimentation.  
797 Experimental procedures were approved by the Institutional Animal Care and Use Committees  
798 at the University of California, San Francisco and at Johns Hopkins University and were carried  
799 out in accordance with the guidelines on animal care and use of the National Institutes of Health  
800 of the United States.

801

802 Viral Vectors: For optogenetic conditioning experiments, Cre-dependent expression of  
803 channelrhodopsin was achieved via injection of AAV5-Ef1 $\alpha$ -DIO-ChR2-eYFP (titer 1.5–  
804 4e<sup>12</sup> particles/mL, University of North Carolina) into the VTA or SNc. For projection-specific  
805 experiments, AAV2/5-Ef1 $\alpha$ -DIO-hChR2(H134R)-eYFP-WPRE-hGH (1.5–4e<sup>12</sup> particles/mL,  
806 University of Pennsylvania), which exhibits retrograde transport<sup>58</sup>, was injected into the NAc  
807 core or dorsal striatum. For combined optogenetic stimulation and photometry experiments, a  
808 mixture of AAVDJ-Ef1 $\alpha$ -DIO-GCaMP6f (titer 1.0-3.9e<sup>12</sup>, Stanford University) and AAV9-hSyn-  
809 FLEX-ChrimsonR-tdTomato (1.5–4e<sup>12</sup> particles/mL, University of Pennsylvania) was injected  
810 into the VTA.

811

812 Surgical Procedures: Viral infusions and optic fiber implants were carried out as previously  
813 described<sup>59</sup>. Rats were anesthetized with 5% isoflurane and placed in a stereotaxic frame, after  
814 which anesthesia was maintained at 1-3%. Rats were administered saline, carprofen anesthetic,  
815 and cefazolin antibiotic intraperitoneally. The top of the skull was exposed and holes were made  
816 for viral infusion needles, optic fiber implants, and 5 skull screws. Viral injections were made  
817 using a microsyringe pump at a rate of 0.1 $\mu$ l/min. Injectors were left in place for 5 min, then  
818 raised 200 microns dorsal to the injection site, left in place for another 10 min, then removed  
819 slowly. Implants were secured to the skull with dental acrylic applied around skull screws and  
820 the base of the ferrule(s) containing the optic fiber. At the end of all surgeries, topical anesthetic  
821 and antibiotic ointment was applied to the surgical site, rats were removed to a heating pad and  
822 monitored until they were ambulatory. Rats were monitored daily for one week following

823 surgery. Optogenetic manipulations commenced at least 4 weeks (6-8 weeks for photometry  
824 and projection-specific studies) after surgery.

825

826 Midbrain cell body targeting: AAV5-Ef1 $\alpha$ -DIO-ChR2-eYFP was infused unilaterally (0.5 to 1  $\mu$ l at  
827 each target site, for a total of 2-4  $\mu$ l per rat) at the following coordinates from Bregma for  
828 targeting VTA cell bodies: posterior -6.2 and -5.4mm, lateral +0.7, ventral -8.4 and -7.4. For  
829 targeting SNc dopamine cell bodies: posterior -5.8 and -5.0, lateral +2.4, ventral -8.0 and -7.0.  
830 Custom-made optic fiber implants (300-micron glass diameter) were inserted unilaterally just  
831 above and between viral injection sites at the following coordinates. VTA: posterior -5.8, lateral  
832 +0.7, ventral -7.5. SNc: posterior -5.3, lateral +2.4, ventral -7.3.

833

834 Projection-specific ChR2 targeting: The retrogradely-traveling AAV2/5-Ef1 $\alpha$ -DIO-  
835 hChR2(H134R)-eYFP-WPRE-hGH was infused unilaterally into the NAc core, shell, or dorsal  
836 striatum. Two injections of 0.5  $\mu$ l each (1 $\mu$ l total per rat) were given along the anterior-posterior  
837 axis at these coordinates from Bregma. NAc core: anterior +2.2 and +1.6, lateral +1.6, ventral -  
838 7.0. NAc shell: anterior +1.8 and +1.2, lateral +0.75, ventral -7.5. Dorsal striatum: anterior +1.8  
839 and +1.0, lateral +2.6, ventral -4.2. Optic fiber implants were inserted above the ipsilateral VTA  
840 (for NAc injections) or SNc (for dorsal striatal injections) at the coordinates listed above.

841

842 Photometry: A mixture of AAVDJ-Ef1 $\alpha$ -DIO-GCaMP6f and AAV9-hSyn-FLEX-ChrimsonR-  
843 tdTomato (0.5-1  $\mu$ l of each, for a total volume of 1-2  $\mu$ l per rat) was injected into the VTA  
844 (posterior -5.8, lateral +0.7, ventral -8.0) or SNc (posterior -5.3, lateral +2.4, ventral -7.4). Low-  
845 auto-fluorescence optic fibers (400 micron, Doric) were inserted just dorsal to the injection site  
846 at the same coordinates as above.

847

848 Optogenetic Stimulation: ChR2 studies utilized 473-nm lasers and ChrimsonR studies utilized  
849 590-nm lasers (OptoEngine), adjusted to read ~10-20mW from the end of the patch cable at  
850 constant illumination. Light output during individual 5-ms light pulses during experiments was  
851 estimated to be  $\approx$ 2 mW/mm<sup>2</sup> at the tip of the intracranial fiber. Light power was measured before  
852 and after every behavioral session to ensure that all equipment was functioning properly. For all  
853 optogenetic studies, optic tethers connecting rats to the rotary joint were sheathed in a  
854 lightweight armored jacket to prevent cable breakage and block visible light transmission.

855

856 Habituation and Optogenetic Pavlovian Training: Rats were first acclimated to the behavioral  
857 chambers (Med Associates), conditioning cues, and optic cable tethering in a ~30-min  
858 habituation session. During this session, rats were tethered to a rotary joint and 20 cue  
859 presentations, with no other consequences, were presented on a 90-s average variable time  
860 (VT) schedule. In each of 12 subsequent conditioning sessions, rats in paired groups were  
861 presented with 25 cue (light + tone, 7 s) – laser stimulation (100 5ms pulses at 20 Hz; laser train  
862 initiated 2 s after cue onset) pairings delivered on a 200-sec VT schedule, producing a ~85 min  
863 total session length. These cues were never associated with another external stimulus (e.g.,  
864 food or water). Rats in unpaired groups also received 25 cue presentations and 25 laser trains  
865 per session, but an average 70-sec VT schedule separated these events in time. The duration  
866 of laser stimulation was chosen to mimic the multi-second dopamine neuron activation and  
867 release patterns seen *in vivo* when animals consume natural rewards, such as sucrose (Fig.  
868 S4). We also confirmed *ex vivo* that dopamine neurons could follow this stimulation pattern with  
869 light-evoked action potentials (Fig. 4; Supplementary Fig. 9). In all groups, cue and laser  
870 delivery were not contingent on an animal's behavior and all rats received the same number of  
871 cue and laser events.

872

873 Conditioned Reinforcement: After optogenetic Pavlovian conditioning, rats were returned to the  
874 same behavioral chambers and tethered as before. At session onset, two levers were extended  
875 into the chamber below the cue lights used in the Pavlovian conditioning phase, and remained  
876 extended through the duration of the session. During 2 90-min sessions, presses on an active  
877 lever resulted in a 2-s presentation of the cue light-tone stimulus compound rats had received  
878 during Pavlovian training (fixed-ratio 1 schedule, with a timeout during each 2-s cue  
879 presentation), but no laser stimulation, to assess the conditioned reinforcing value of the cues  
880 alone. Inactive lever presses were recorded, but had no consequences.

881

882 Intracranial Self-Stimulation (2 1-hr sessions): Rats were again returned to the behavioral  
883 chambers and tethered. During these sessions, nose poke ports were positioned on the wall  
884 opposite of the cue lights and levers from previous phases. During 2 1-hr sessions, pokes in the  
885 active port resulted in a 1-s laser train (20 Hz, 20 5-ms pulses, fixed-ratio 1 schedule with a 1-s  
886 timeout during each train), but no other external cue events, to assess the reinforcing value of  
887 stimulation itself. Inactive nose pokes were recorded, but had no consequences.

888

889 Video Scoring: Behavior during Pavlovian conditioning sessions was video recorded (Media  
890 Recorder, Noldus) using cameras positioned a standardized distance behind each chamber.  
891 Videos from sessions 1, 4, 8 and 12 were scored offline by observers who were blind to the  
892 identity and anatomical target group of the rats. Each 7-s cue (25 per session) and 5-s laser (25  
893 per session) event was scored for the occurrence and onset latency of the following behaviors.  
894 *Locomotion*: Defined as the rat moving all four feet in some direction (i.e., not simply lifting feet  
895 in place). *Cue Approach*: Defined as the rat's nose coming within 1 in of the cue light (trials in  
896 which the rat's nose was in front of the light when it was presented were not counted in the  
897 approach measure). Approach often, but not always, involved the rat moving from another area  
898 of the chamber to come in physical contact with the cue light. *Rearing*: Defined as the rat lifting  
899 its head and front feet off the chamber floor, either onto the side of the chamber, or into the air.  
900 *Circling/Turning*: Defined as the rat making a complete 360-degree turn in one direction (head  
901 turns without a full body rotation were not counted).

902  
903 Ex vivo electrophysiology: 5-6 weeks following virus injection (described above), rats were  
904 deeply anesthetized with isoflurane, decapitated, and brains were removed. 200  $\mu$ M horizontal  
905 slices of the midbrain were cut in ice cold aCSF, then maintained at 33°C for current clamp  
906 recording as in previous studies<sup>60</sup>. ChR2-expressing neurons were identified with  
907 epifluorescence on the recording scope (AxioExaminer A1, also equipped with infrared and  
908 Dodt optics, Zeiss). ChR2 was activated by transmitting 470-nm light generated by an LED (XR-  
909 E XLamp LED; Cree) coupled to a 200  $\mu$ m fiber optic pointed at the recorded cell and powered  
910 by an LED driver (Mightex Systems) and triggered by a Master 8. Cells were filled with biocytin  
911 during the recording, and when the recording was complete, the slice was fixed in 4%  
912 formaldehyde for 4 hr. Immunocytochemistry was completed as in previous studies<sup>60</sup>.

913  
914 Fiber Photometry: Fiber photometry allows for real time the excitation and detection of bulk  
915 fluorescence from genetically encoded calcium indicators, through the same optic fiber, in a  
916 freely moving animal. We first assessed dopamine neuron activity, via GCaMP6f fluorescence,  
917 in a sucrose-cue conditioning task. Rats underwent Pavlovian training wherein an auditory cue  
918 was presented on a 45-sec variable time schedule. During the final 3 sec of the 10-sec long  
919 cue, a bolus of 10% sucrose solution was delivered to a reward port via a syringe pump. Port  
920 entries and sucrose consumption were recorded simultaneous with photometry measurements  
921 of dopamine neuron activity. Rats received 7 sessions of 30 cue-sucrose pairings each, during  
922 which we observed robust cue and sucrose-evoked fluorescent signals. Cue signals showed a

923 rapid onset and quickly returned to baseline before the sucrose consumption-related signal  
924 emerged, which lasted several seconds. These data show that fiber photometry can be used to  
925 observe rapid cue responses in dopamine neurons, and that natural reward consumption  
926 produces multi-second activation of dopamine neurons, comparable to the 5-sec laser  
927 stimulation train we employ in optogenetic conditioning studies.

928

929 To assess dopamine neuron activity during optogenetic Pavlovian conditioning, we co-  
930 transfected dopamine neurons with GCaMP6f and ChrimsonR, a red-shifted excitatory  
931 opsin<sup>61</sup>. This approach allowed for simultaneous measurement of activity-dependent  
932 fluorescence, excited by low power blue light, and optogenetic activation using orange light, in  
933 the same neurons<sup>62</sup>. The photometry system was constructed similar to previous studies<sup>43</sup>. A  
934 fluorescence mini-cube (Doric Lenses) transmitted light streams from a 465-nm LED  
935 sinusoidally modulated at 211 Hz that passed through a GFP excitation filter, and a 405-nm  
936 LED modulated at 531 Hz that passed through a 405-nm bandpass filter. LED power was set at  
937 ~100 microwatts. The mini-cube also transmitted light from a 590-nm laser, for optogenetic  
938 activation of ChrimsonR through the same low-autofluorescence fiber cable (400nm, 0.48 NA),  
939 which was connected to the optic fiber implant on the rat. GCaMP6f fluorescence from neurons  
940 below the fiber tip in the brain was transmitted via this same cable back to the mini-cube, where  
941 it was passed through a GFP emission filter, amplified, and focused onto a high sensitivity  
942 photoreceiver (Newport, Model 2151). Demodulation of the brightness produced by the 465-nm  
943 excitation, which stimulates calcium-dependent GCaMP6f fluorescence, versus isosbestic 405-  
944 nm excitation, which stimulates GCaMP6f in a calcium-independent manner, allowed for  
945 correction for bleaching and movement artifacts. A real-time signal processor (RP2.1, Tucker-  
946 Davis Technologies) running OpenEx software modulated the output of each LED and recorded  
947 photometry signals, which were sampled from the photodetector at 6.1 kHz. The signals  
948 generated by the two LEDs were demodulated and decimated to 382 Hz for recording to disk.  
949 For analysis, both signals were then downsampled to 40 Hz, and a least-squares linear fit was  
950 applied to the 405-nm signal, to align it to the 465-nm signal. This fitted 405-nm signal was used  
951 to normalize the 465-nm signal, where  $\Delta F/F = (465\text{-nm signal} - \text{fitted } 405\text{-nm signal}) / (\text{fitted } 405\text{-}$   
952  $\text{nm signal})$ . Task events (e.g., cue and laser presentations), were time stamped in the  
953 photometry data file via a signal from the Med-PC behavioral program, and behavior was video  
954 recorded as described above.

955

956 Photometry rats (n=3) went through opto-Pavlovian conditioning, similar to as described above,  
957 but the intertrial interval for these experiments was halved to a 100-sec VT, for a ~40-min  
958 session length. This was done to shorten the overall length of photometry measurement periods  
959 to minimize photobleaching of GCaMP-expressing cells. Photometry measurements were made  
960 on training sessions 1, 4, 8, and 12, during which both LED channels were modulated  
961 continuously, as described above. On these 4 sessions, 20% of trials (5/25), pseudo-randomly  
962 presented, were “probes”, where cues were presented without accompanying optogenetic  
963 stimulation.

964

965 For baseline characterization of ChrimsonR-activated GCaMP6f signals, rats (n=5) were  
966 tethered to the photometry apparatus, and continuous photometry measurements were made  
967 during a series of 60 unsignalled 590-nm laser presentations (30 trials of 1-sec, 20 Hz  
968 stimulation trains, 30 trials of 5-sec, 20 Hz trains, counterbalanced), delivered on a 30-sec VT  
969 schedule.

970

971 ChrimsonR ICSS: Th-cre+ rats (n=7) were given the opportunity to respond for 590-nm laser  
972 pulses (1 s, 20 Hz), in 2 1-hr sessions, similar to above, to validate ChrimsonR support of  
973 dopamine-mediated primary reinforcement. On a third session, the laser was switched from  
974 orange to blue (473-nm), to verify that ChrimsonR activation necessary to support behavior is  
975 specific to red-shifted light.

976

977 Statistics and Data Collection: Behavioral data from optogenetic conditioning experiments were  
978 recorded with Med-PC software (Med Associates) and analyzed using Prism 6.0. Two-way  
979 repeated measures ANOVA was used to analyze changes in behavior among the groups across  
980 training. Bonferroni-corrected post hoc comparisons were made to compare groups on  
981 individual sessions. Effect sizes were not predetermined. Rats were included in optogenetic  
982 behavioral analyses if optic fiber tips were no more than ~500 microns dorsal to the target  
983 region (VTA or SNc). Photometry data was collected with TDT software and analyzed using  
984 MATLAB. To assess the change in fluorescence across training days we fit a linear mixed-effect  
985 model for  $\Delta F/F$  during each period of interest (0-1 s post-cue, laser on period, and laser  
986 omission period), with fixed effects for day and random effects for subject. To assess the  
987 relationship between the magnitude of cue-evoked fluorescence and CR latency, we fit a linear  
988 mixed-effect model for latency with fixed effects for cue-evoked fluorescence magnitude and

989 random effects for subject. All comparisons were two tailed. Statistical significance was set at  
990  $p < 0.05$ .

991

992 Histology: Rats were deeply anesthetized with sodium pentobarbital and transcardially perfused  
993 with cold phosphate buffered saline followed by 4% paraformaldehyde. Brains were removed  
994 and post-fixed in 4% paraformaldehyde for ~24 hours, then cryoprotected in a 25% sucrose  
995 solution for at least 48 hours. Sections were cut at 50 microns on a cryostat (Leica  
996 Microsystems). To confirm viral expression and optic fiber placements, brain sections containing  
997 the midbrain were mounted on microscope slides and coverslipped with Vectashield containing  
998 DAPI counterstain. Fluorescence from ChR2-eYFP and ChrimsonR-tdTomato as well as optic  
999 fiber damage location was then visualized. Tissue from wild type animals was examined for lack  
1000 of viral expression and optic fiber placements. To verify localization of viral expression in  
1001 dopamine neurons we performed immunohistochemistry for tyrosine hydroxylase and  
1002 GFP/tdTomato. Sections were washed in PBS and incubated with bovine serum albumin (BSA)  
1003 and Triton X-100 (each 0.2%) for 20 min. 10% normal donkey serum (NDS) was added for a 30-  
1004 min incubation, before primary antibody incubation (mouse anti-GFP, 1:1500, Invitrogen; rabbit  
1005 anti-TH, 1:500, Fisher Scientific) overnight at 4°C in PBS with BSA and Triton X-100 (each  
1006 0.2%). Sections were then washed and incubated with 2% NDS in PBS for 10 minutes and  
1007 secondary antibodies were added (1:200 Alexa Fluor 488 donkey anti-mouse, 594 donkey anti-  
1008 rabbit or 647 chicken anti-rabbit) for 2 hours at room temperature. Sections were washed 2  
1009 times in PBS and mounted with Vectashield containing DAPI. Brain sections were imaged with a  
1010 Zeiss Axio 2 microscope.

1011

1012 For cell counting to quantify targeting specificity in TH-cre rats (Supplementary Fig. 1), the  
1013 Apotome microscope function was used to take 20x 3-channel images along the medial-lateral  
1014 and anterior-posterior gradients of the midbrain, using equivalent exposure and threshold  
1015 settings. With the TH channel turned off, YFP+ cells were first identified by a clear ring around  
1016 DAPI-stained nuclei. The TH channel was then overlaid, and the proportion of YFP+ cells co-  
1017 expressing TH was counted. Cell counting for quantification of ChrimsonR and GCaMP6f  
1018 expression overlap (Supplementary Fig. 4) was done as above. GCaMP6f-expressing cells  
1019 directly below optic fiber placements were counted, and then the proportion of co-expressing  
1020 cells was determined by overlaying the ChrimsonR channel.

1021

1022 For assessing retrograde AAV expression (Fig. S9), sections containing the striatum and  
1023 midbrain from brains with AAV2/5-Ef1 $\alpha$ -DIO-hChR2(H134R)-eYFP-WPRE-hGH injections  
1024 targeting the NAc core (n=4), shell (n=5), or dorsal striatum (n=5) were processed with  
1025 immunohistochemistry for YFP and TH, as above. Tiled images of whole sections (6-10 sections  
1026 per rat) containing the midbrain were then taken at three approximate anatomical levels: -5.0, -  
1027 5.5, and -6.0 mm posterior to bregma based on the Paxinos and Watson rat brain atlas. The  
1028 topography of retrograde expression was estimated by drawing regions of interest (ROIs)  
1029 around the area within each brain section containing YFP+ cell bodies. Individual brain slices  
1030 containing these ROIs were then overlaid in Adobe Illustrator and aligned to standardized atlas  
1031 plates for visualization of average expression patterns according to projection.

1032

### 1033 **References**

1034

1035 58. Rothermel, M., Brunert, D., Zabawa, C., Díaz-Quesada, M. & Wachowiak, M. Transgene  
1036 expression in target-defined neuron populations mediated by retrograde infection with adeno-  
1037 associated viral vectors. *J Neurosci* **33**, 15195–15206 (2013).

1038

1039 59. Steinberg, E. E. *et al.* Positive reinforcement mediated by midbrain dopamine neurons  
1040 requires D1 and D2 receptor activation in the nucleus accumbens. *PLoS ONE* **9**, e94771  
1041 (2014).

1042

1043 60. Margolis, E. B., Hjelmstad, G. O., Fujita, W. & Fields, H. L. Direct bidirectional  $\mu$ -opioid  
1044 control of midbrain dopamine neurons. *J Neurosci* **34**, 14707–14716 (2014).

1045

1046 61. Klapoetke, N. C. *et al.* Independent optical excitation of distinct neural populations. *Nat*  
1047 *Methods* **11**, 338–346 (2014).

1048

1049 62. Kim, C. K. *et al.* Simultaneous fast measurement of circuit dynamics at multiple sites  
1050 across the mammalian brain. *Nat Methods* **13**, 325–328 (2016).

1051

1052

1053
